# Supplementary material
Source: Springer Nature journal article supplement (https://www.springermedizin.de/resource/supplementary/12889_2013_5793_MOESM2_ESM.pdf/9496754)

Figure 1a. Effect of breastfeeding education on the rate of exclusive breastfeeding at day 1: individual vs group counseling.

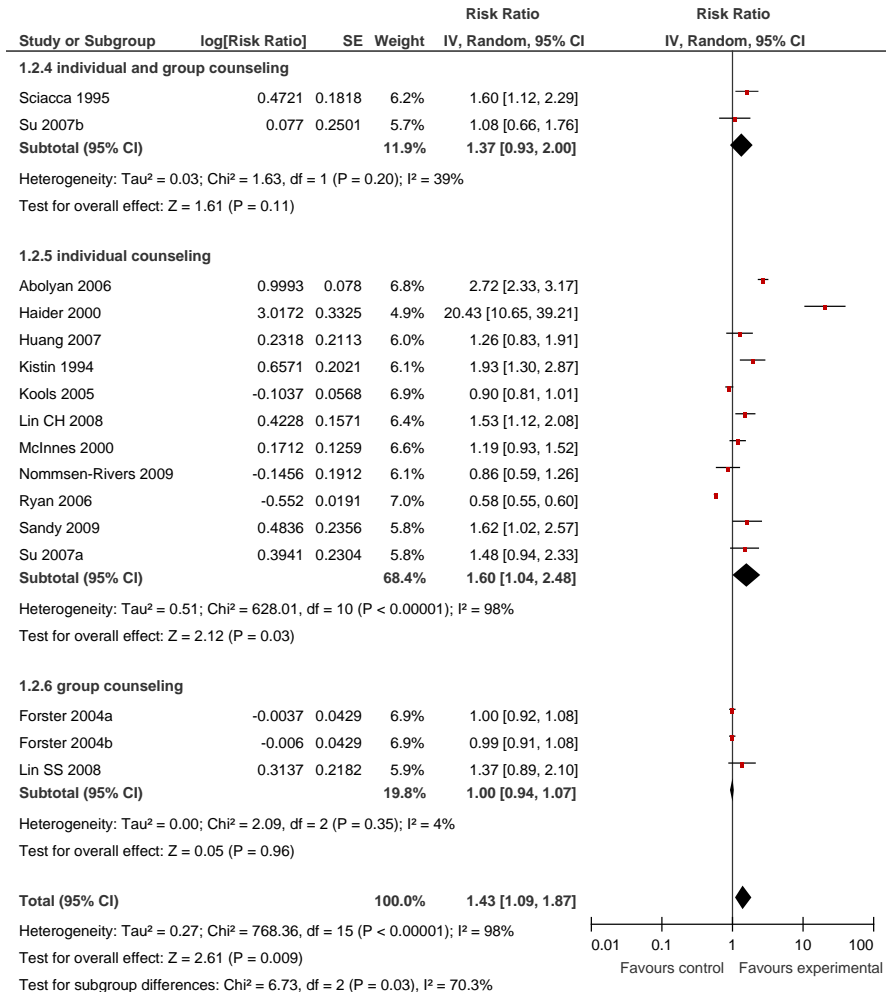

Figure 1b. Effect of breastfeeding education on the rate of exclusive breastfeeding at day 1: community- vs facility-based interventions.

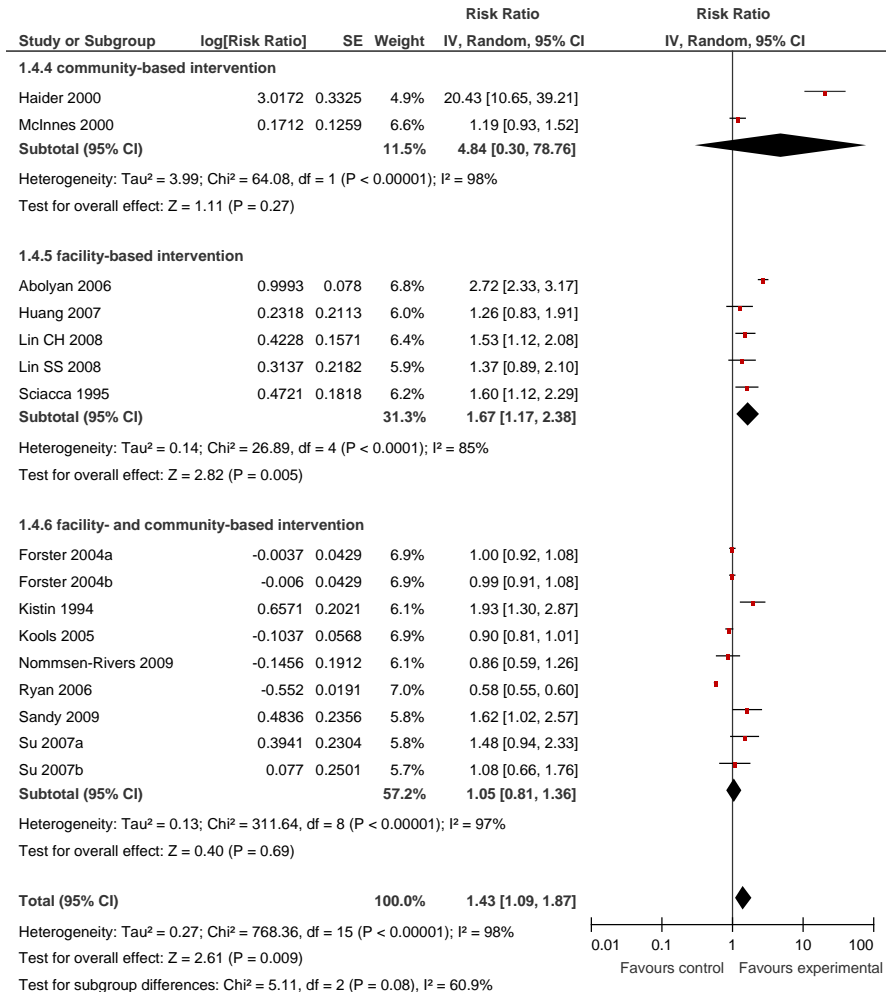

Figure 1c. Effect of breastfeeding education on the rate of exclusive breastfeeding at day 1: developing vs developed countries.

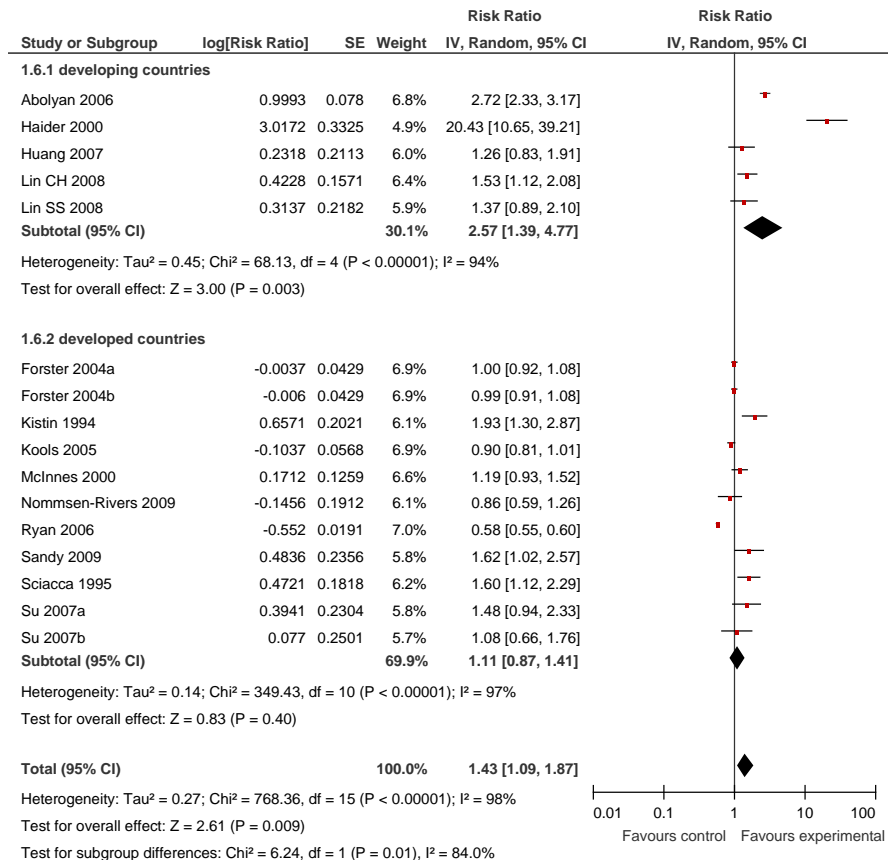

Figure 2a. Effect of breastfeeding education on the rate of exclusive breastfeeding at 0-1 month: individual vs group counseling.

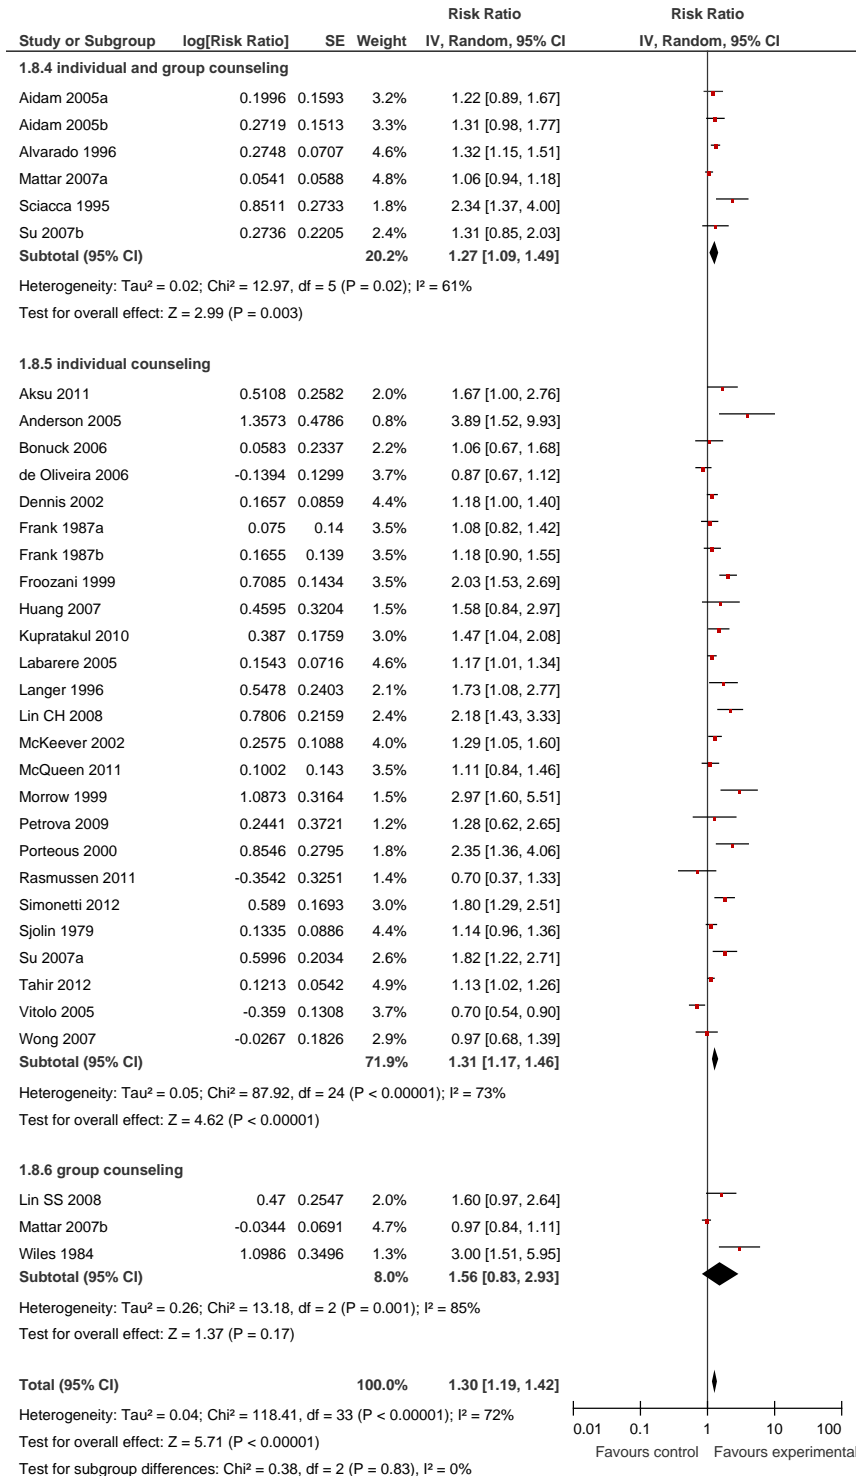

Figure 2b. Effect of breastfeeding education on the rate of exclusive breastfeeding at 0-1 month: community- vs facility-based interventions.

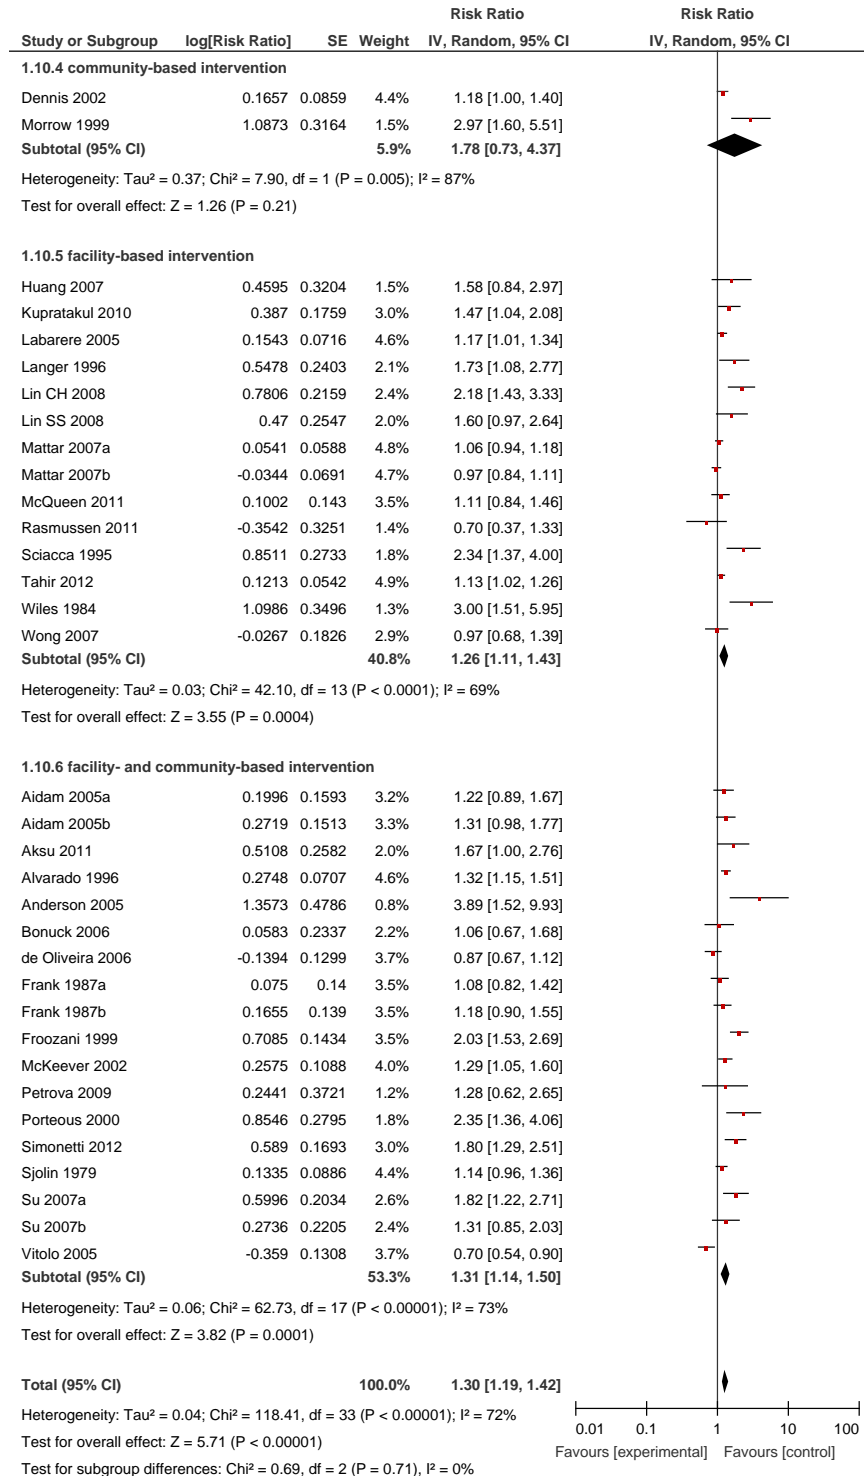

Figure 2c. Effect of breastfeeding education on the rate of exclusive breastfeeding at 0-1 month: developing vs developed countries.

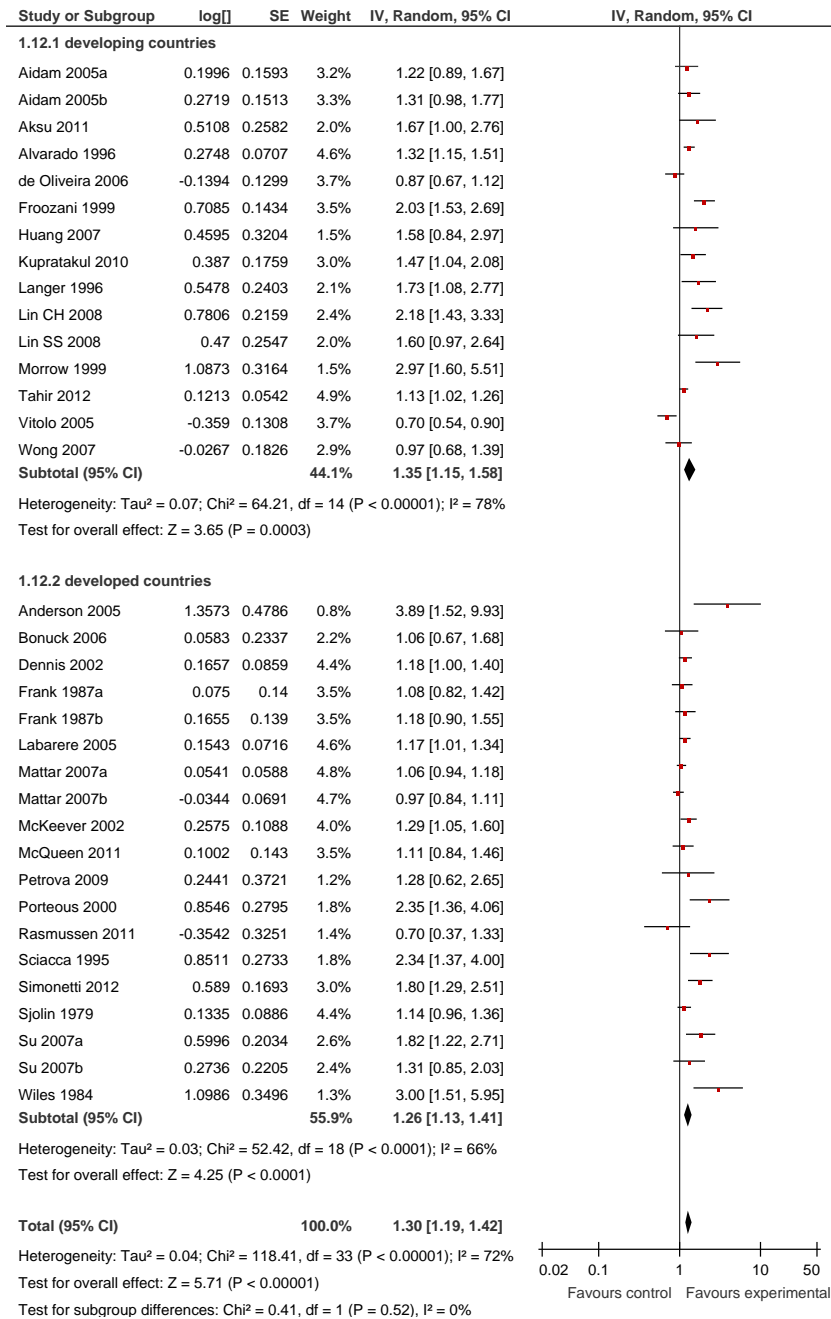

Figure 3a. Effect of breastfeeding education on the rate of exclusive breastfeeding at 1-6 months: individual vs group counseling.

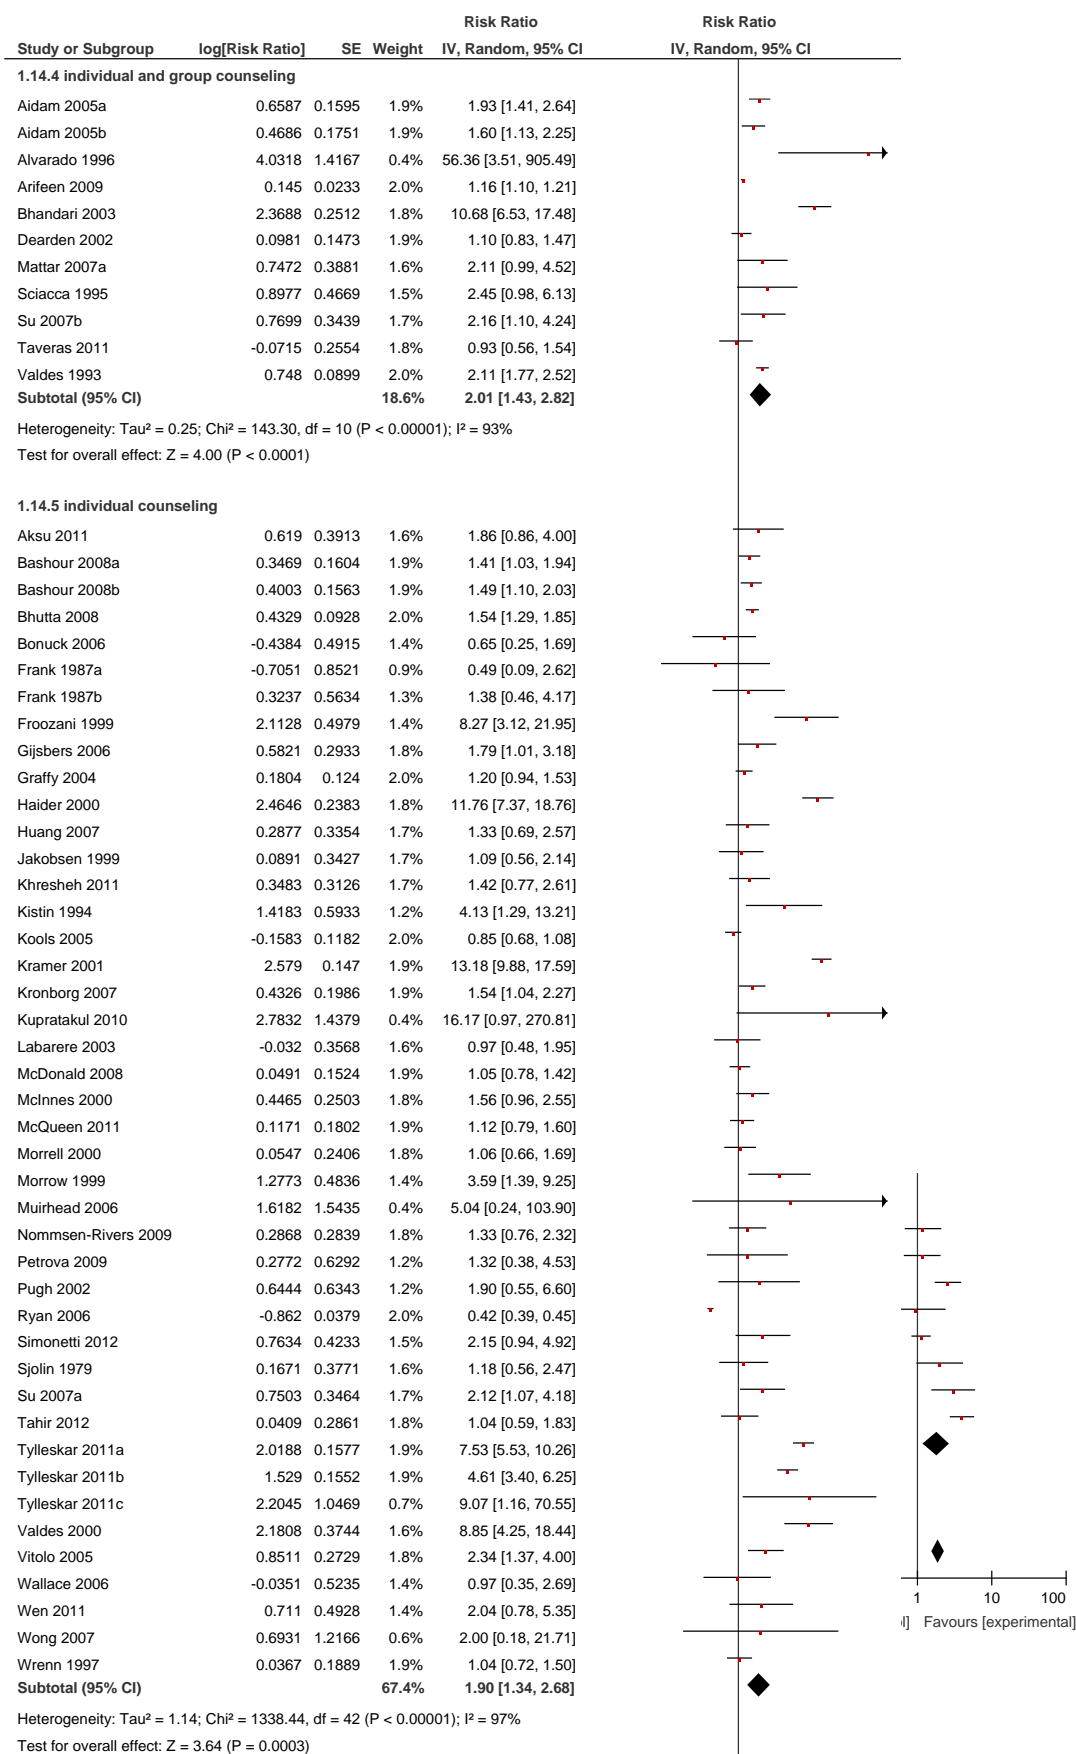

Figure 3b. Effect of breastfeeding education on the rate of exclusive breastfeeding at 1-6 months: community- vs facility-based interventions.

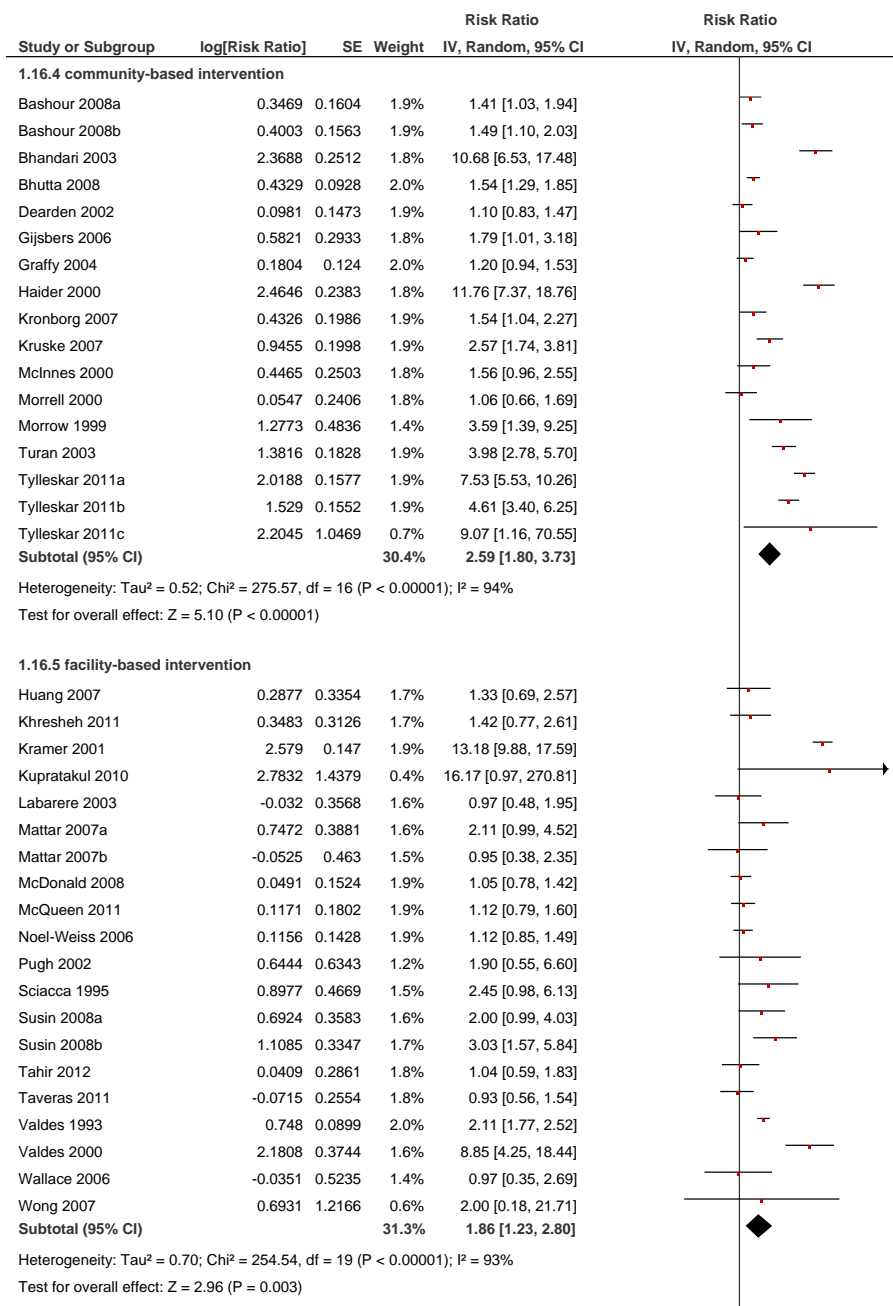



1.16.6 facility- and community-based intervention

|                          |         |        |              |                          |
|--------------------------|---------|--------|--------------|--------------------------|
| Aidam 2005a              | 0.6587  | 0.1595 | 1.9%         | 1.93 [1.41, 2.64]        |
| Aidam 2005b              | 0.4686  | 0.1751 | 1.9%         | 1.60 [1.13, 2.25]        |
| Aksu 2011                | 0.619   | 0.3913 | 1.6%         | 1.86 [0.86, 4.00]        |
| Alvarado 1996            | 4.0318  | 1.4167 | 0.4%         | 56.36 [3.51, 905.49]     |
| Arifeen 2009             | 0.145   | 0.0233 | 2.0%         | 1.16 [1.10, 1.21]        |
| Bonuck 2006              | -0.4384 | 0.4915 | 1.4%         | 0.65 [0.25, 1.69]        |
| Forster 2004a            | 0.1738  | 0.2779 | 1.8%         | 1.19 [0.69, 2.05]        |
| Forster 2004b            | 0.1481  | 0.2805 | 1.8%         | 1.16 [0.67, 2.01]        |
| Frank 1987a              | -0.7051 | 0.8521 | 0.9%         | 0.49 [0.09, 2.62]        |
| Frank 1987b              | 0.3237  | 0.5634 | 1.3%         | 1.38 [0.46, 4.17]        |
| Froozani 1999            | 2.1128  | 0.4979 | 1.4%         | 8.27 [3.12, 21.95]       |
| Jakobsen 1999            | 0.0891  | 0.3427 | 1.7%         | 1.09 [0.56, 2.14]        |
| Kistin 1994              | 1.4183  | 0.5933 | 1.2%         | 4.13 [1.29, 13.21]       |
| Kools 2005               | -0.1583 | 0.1182 | 2.0%         | 0.85 [0.68, 1.08]        |
| Muirhead 2006            | 1.6182  | 1.5435 | 0.4%         | 5.04 [0.24, 103.90]      |
| Nommsen-Rivers 2009      | 0.2868  | 0.2839 | 1.8%         | 1.33 [0.76, 2.32]        |
| Petrova 2009             | 0.2772  | 0.6292 | 1.2%         | 1.32 [0.38, 4.53]        |
| Ryan 2006                | -0.862  | 0.0379 | 2.0%         | 0.42 [0.39, 0.45]        |
| Simonetti 2012           | 0.7634  | 0.4233 | 1.5%         | 2.15 [0.94, 4.92]        |
| Sjolin 1979              | 0.1671  | 0.3771 | 1.6%         | 1.18 [0.56, 2.47]        |
| Su 2007a                 | 0.7503  | 0.3464 | 1.7%         | 2.12 [1.07, 4.18]        |
| Su 2007b                 | 0.7699  | 0.3439 | 1.7%         | 2.16 [1.10, 4.24]        |
| Vitolo 2005              | 0.8511  | 0.2729 | 1.8%         | 2.34 [1.37, 4.00]        |
| Wen 2011                 | 0.711   | 0.4928 | 1.4%         | 2.04 [0.78, 5.35]        |
| Wrenn 1997               | 0.0367  | 0.1889 | 1.9%         | 1.04 [0.72, 1.50]        |
| <b>Subtotal (95% CI)</b> |         |        | <b>38.2%</b> | <b>1.49 [1.10, 2.00]</b> |

Heterogeneity:  $\tau^2 = 0.41$ ;  $\text{Chi}^2 = 625.35$ ,  $\text{df} = 24$  ( $P < 0.00001$ );  $I^2 = 96\%$

Test for overall effect:  $Z = 2.60$  ( $P = 0.009$ )

**Total (95% CI)** **100.0%** **1.90 [1.54, 2.34]**

Heterogeneity:  $\tau^2 = 0.57$ ;  $\text{Chi}^2 = 1629.52$ ,  $\text{df} = 61$  ( $P < 0.00001$ );  $I^2 = 96\%$

Test for overall effect:  $Z = 5.97$  ( $P < 0.00001$ )

Test for subgroup differences:  $\text{Chi}^2 = 5.29$ ,  $\text{df} = 2$  ( $P = 0.07$ ),  $I^2 = 62.2\%$

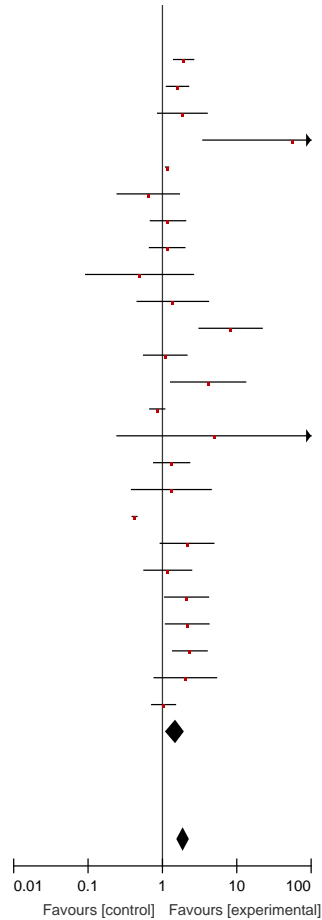

Figure 3c. Effect of breastfeeding education on the rate of exclusive breastfeeding at 1-6 months: developing vs developed countries.

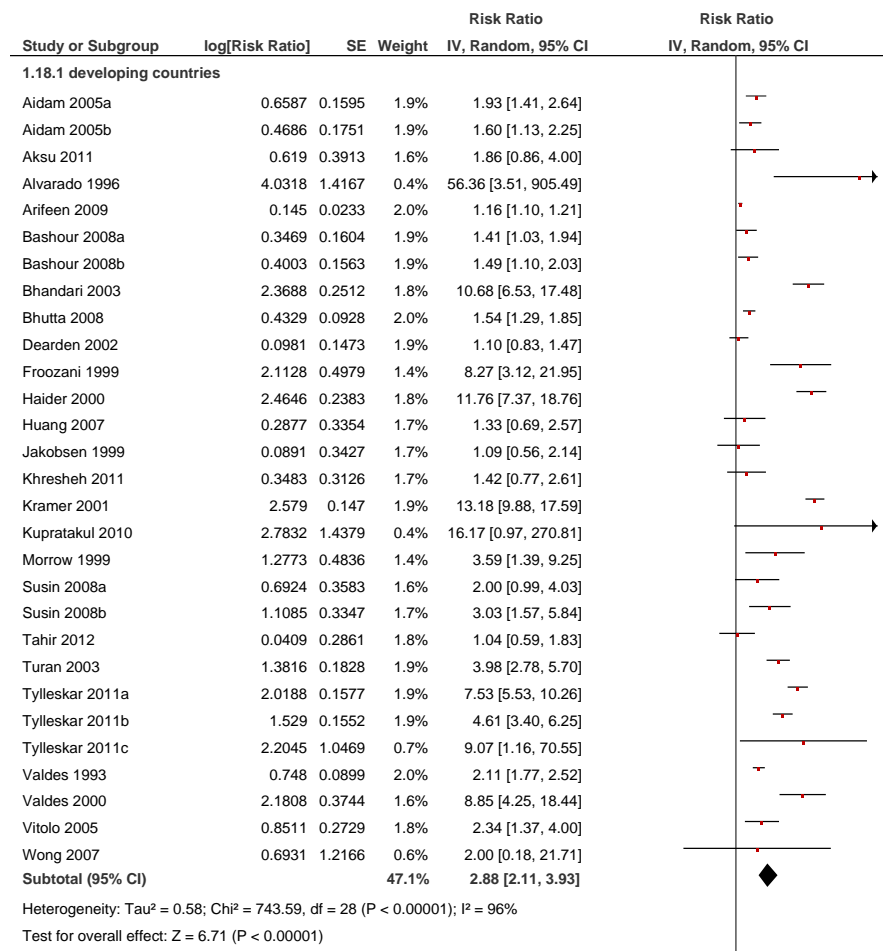

1.18.2 developed countries

| Study                    | log[OR] | SE     | Weight       | IV, Random, 95% CI       |
|--------------------------|---------|--------|--------------|--------------------------|
| Bonuck 2006              | -0.4384 | 0.4915 | 1.4%         | 0.65 [0.25, 1.69]        |
| Forster 2004a            | 0.1738  | 0.2779 | 1.8%         | 1.19 [0.69, 2.05]        |
| Forster 2004b            | 0.1481  | 0.2805 | 1.8%         | 1.16 [0.67, 2.01]        |
| Frank 1987a              | -0.7051 | 0.8521 | 0.9%         | 0.49 [0.09, 2.62]        |
| Frank 1987b              | 0.3237  | 0.5634 | 1.3%         | 1.38 [0.46, 4.17]        |
| Gijsbers 2006            | 0.5821  | 0.2933 | 1.8%         | 1.79 [1.01, 3.18]        |
| Graffy 2004              | 0.1804  | 0.124  | 2.0%         | 1.20 [0.94, 1.53]        |
| Kistin 1994              | 1.4183  | 0.5933 | 1.2%         | 4.13 [1.29, 13.21]       |
| Kools 2005               | -0.1583 | 0.1182 | 2.0%         | 0.85 [0.68, 1.08]        |
| Kronborg 2007            | 0.4326  | 0.1986 | 1.9%         | 1.54 [1.04, 2.27]        |
| Kruske 2007              | 0.9455  | 0.1998 | 1.9%         | 2.57 [1.74, 3.81]        |
| Labarere 2003            | -0.032  | 0.3568 | 1.6%         | 0.97 [0.48, 1.95]        |
| Mattar 2007a             | 0.7472  | 0.3881 | 1.6%         | 2.11 [0.99, 4.52]        |
| Mattar 2007b             | -0.0525 | 0.463  | 1.5%         | 0.95 [0.38, 2.35]        |
| McDonald 2008            | 0.0491  | 0.1524 | 1.9%         | 1.05 [0.78, 1.42]        |
| McInnes 2000             | 0.4465  | 0.2503 | 1.8%         | 1.56 [0.96, 2.55]        |
| McQueen 2011             | 0.1171  | 0.1802 | 1.9%         | 1.12 [0.79, 1.60]        |
| Morrell 2000             | 0.0547  | 0.2406 | 1.8%         | 1.06 [0.66, 1.69]        |
| Muirhead 2006            | 1.6182  | 1.5435 | 0.4%         | 5.04 [0.24, 103.90]      |
| Noel-Weiss 2006          | 0.1156  | 0.1428 | 1.9%         | 1.12 [0.85, 1.49]        |
| Nommensen-Rivers 2009    | 0.2868  | 0.2839 | 1.8%         | 1.33 [0.76, 2.32]        |
| Petrova 2009             | 0.2772  | 0.6292 | 1.2%         | 1.32 [0.38, 4.53]        |
| Pugh 2002                | 0.6444  | 0.6343 | 1.2%         | 1.90 [0.55, 6.60]        |
| Ryan 2006                | -0.862  | 0.0379 | 2.0%         | 0.42 [0.39, 0.45]        |
| Sciacca 1995             | 0.8977  | 0.4669 | 1.5%         | 2.45 [0.98, 6.13]        |
| Simonetti 2012           | 0.7634  | 0.4233 | 1.5%         | 2.15 [0.94, 4.92]        |
| Sjolin 1979              | 0.1671  | 0.3771 | 1.6%         | 1.18 [0.56, 2.47]        |
| Su 2007a                 | 0.7503  | 0.3464 | 1.7%         | 2.12 [1.07, 4.18]        |
| Su 2007b                 | 0.7699  | 0.3439 | 1.7%         | 2.16 [1.10, 4.24]        |
| Taveras 2011             | -0.0715 | 0.2554 | 1.8%         | 0.93 [0.56, 1.54]        |
| Wallace 2006             | -0.0351 | 0.5235 | 1.4%         | 0.97 [0.35, 2.69]        |
| Wen 2011                 | 0.711   | 0.4928 | 1.4%         | 2.04 [0.78, 5.35]        |
| Wrenn 1997               | 0.0367  | 0.1889 | 1.9%         | 1.04 [0.72, 1.50]        |
| <b>Subtotal (95% CI)</b> |         |        | <b>52.9%</b> | <b>1.31 [1.00, 1.70]</b> |

Heterogeneity:  $\tau^2 = 0.45$ ;  $\chi^2 = 387.42$ ,  $df = 32$  ( $P < 0.00001$ );  $I^2 = 92\%$   
 Test for overall effect:  $Z = 2.00$  ( $P = 0.05$ )

**Total (95% CI)** 100.0% 1.90 [1.54, 2.34]

Heterogeneity:  $\tau^2 = 0.57$ ;  $\chi^2 = 1629.52$ ,  $df = 61$  ( $P < 0.00001$ );  $I^2 = 96\%$   
 Test for overall effect:  $Z = 5.97$  ( $P < 0.00001$ )

Test for subgroup differences:  $\chi^2 = 14.69$ ,  $df = 1$  ( $P = 0.0001$ ),  $I^2 = 93.2\%$

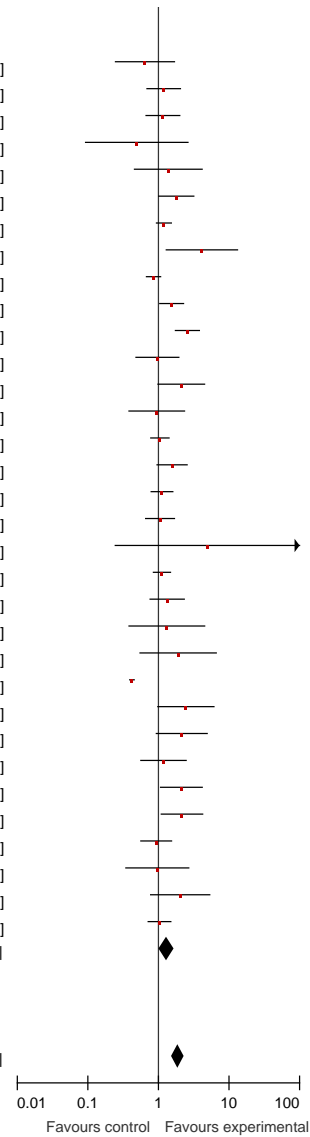

Figure 3d. Effect of breastfeeding education on the rate of exclusive breastfeeding at 6-12 months.

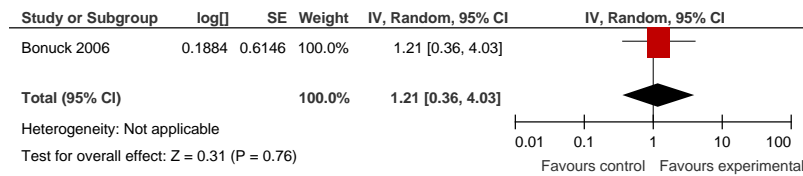

Figure 4a. Effect of breastfeeding education on the rate of predominant breastfeeding at 0-1 month: individual vs group counseling.

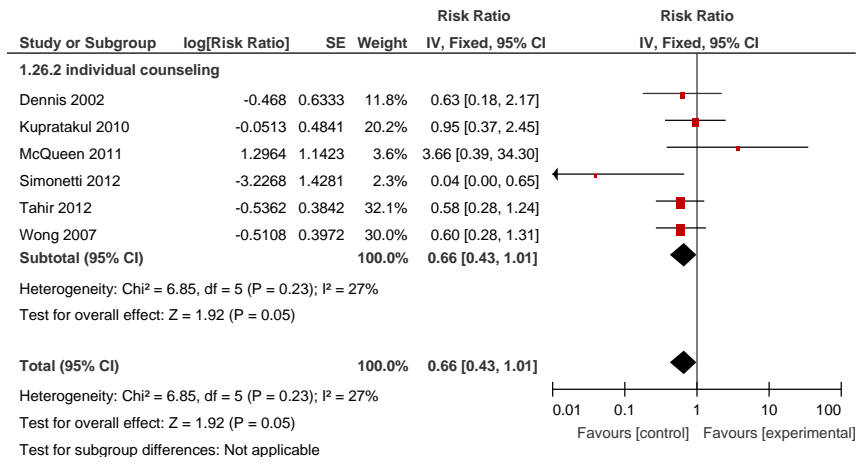

Figure 4b. Effect of breastfeeding education on the rate of predominant breastfeeding at 0-1 month: community- vs facility-based interventions.

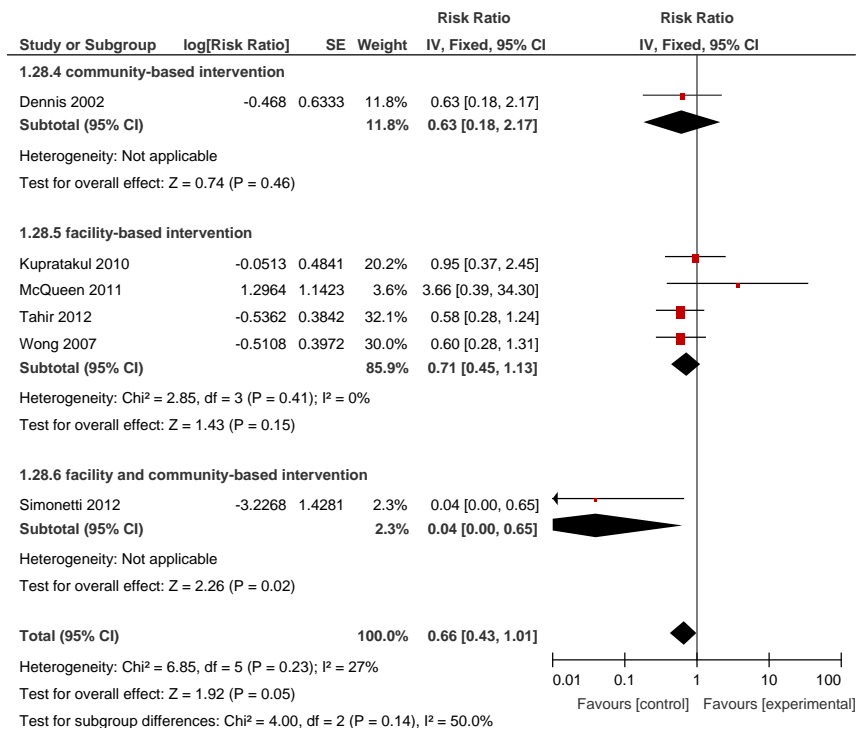

Figure 4c. Effect of breastfeeding education on the rate of predominant breastfeeding at 0-1 month: developing vs developed countries.

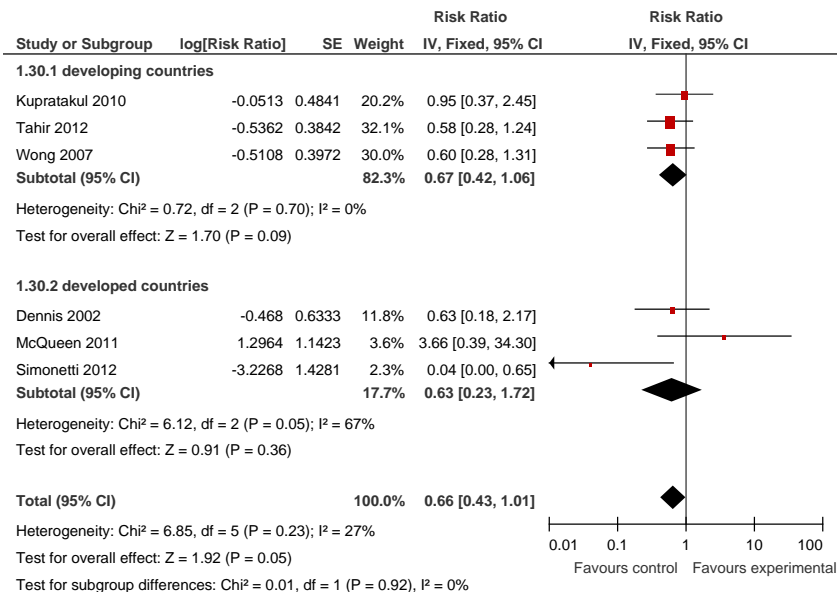

Figure 5a. Effect of breastfeeding education on the rate of predominant breastfeeding at 1-6 months: individual vs group counseling.

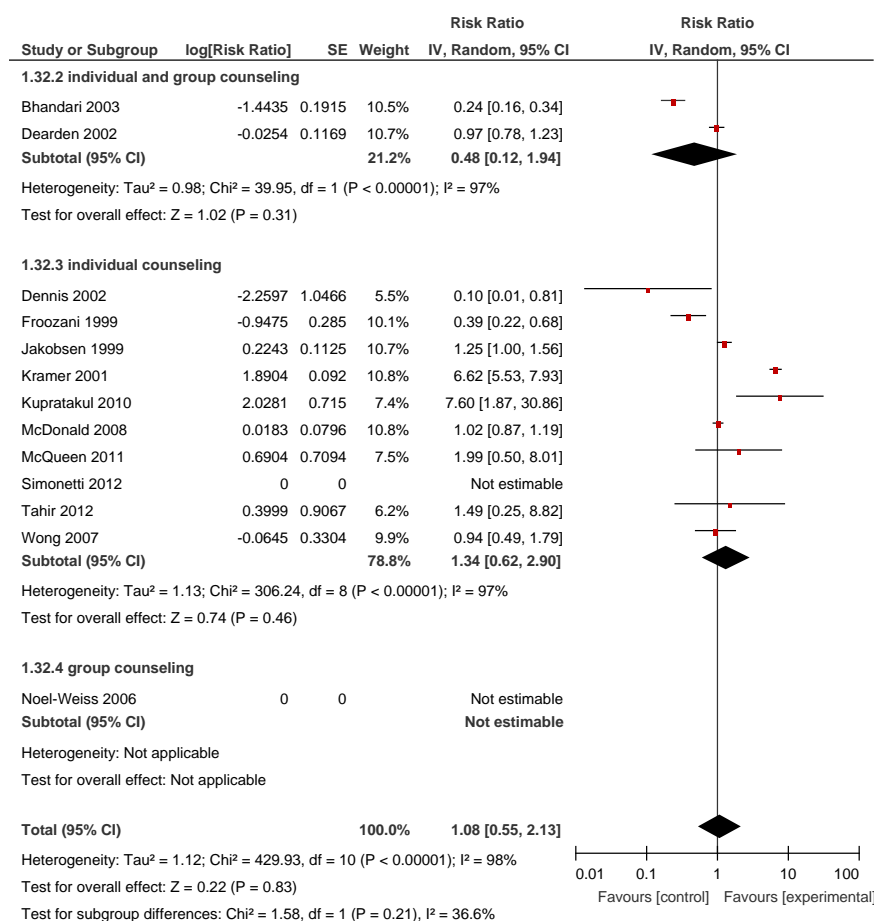

Figure 5b. Effect of breastfeeding education on the rate of predominant breastfeeding at 1-6 months: community- vs facility-based interventions.

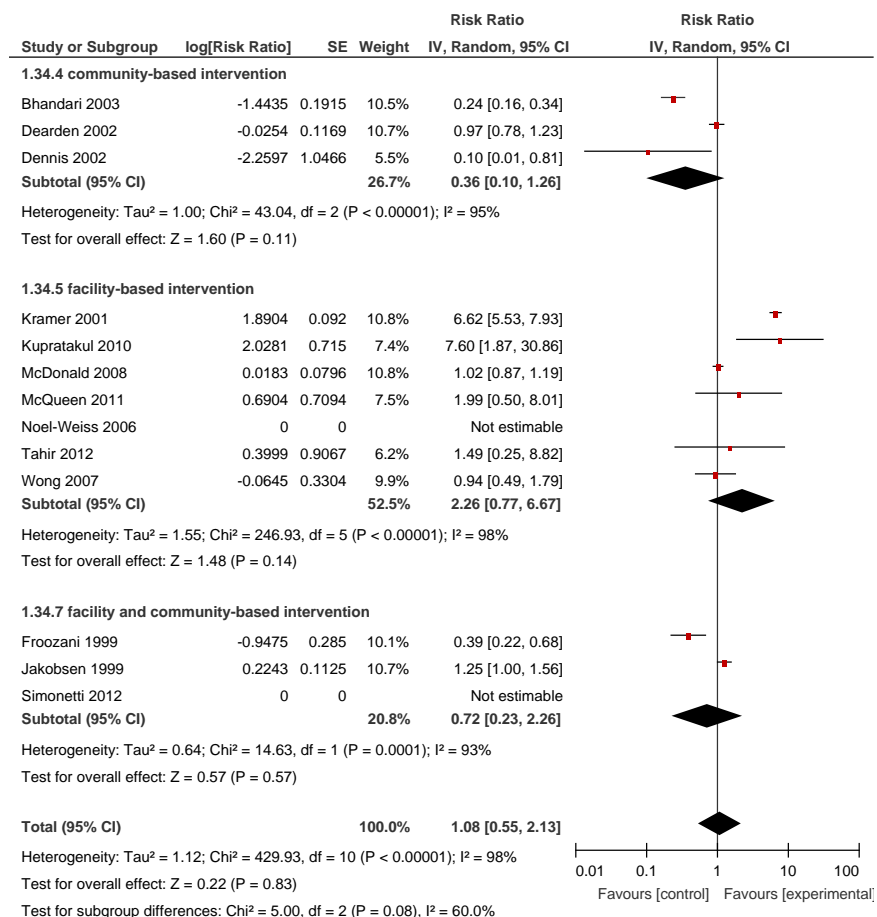

Figure 5c. Effect of breastfeeding education on the rate of predominant breastfeeding at 1-6 months: developing vs developed countries.

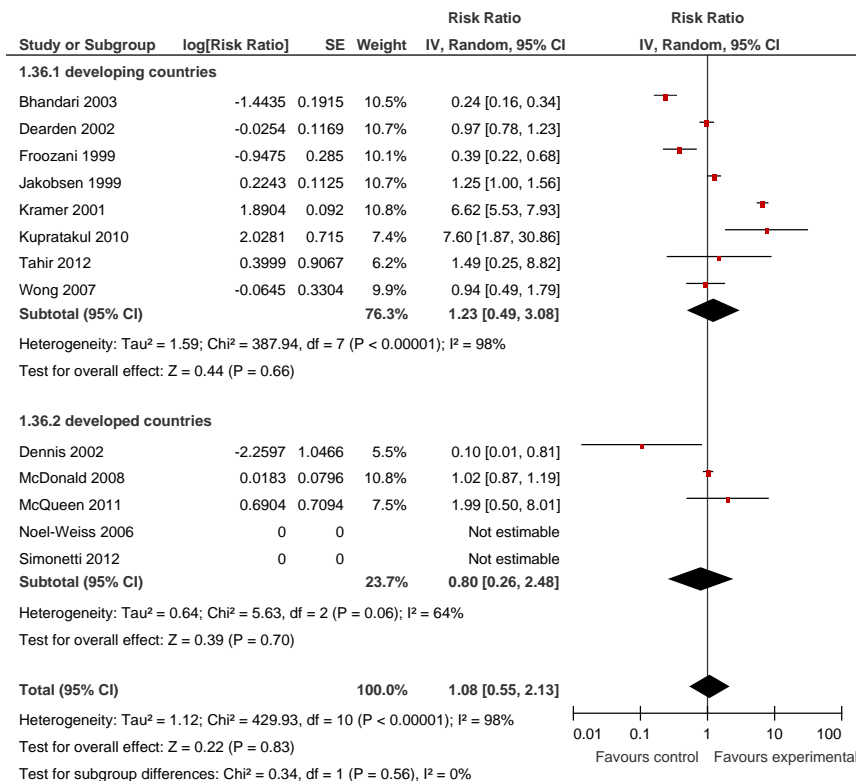



Figure 6a. Effect of breastfeeding education on the rate of partial breastfeeding at day 1: individual vs group counseling.

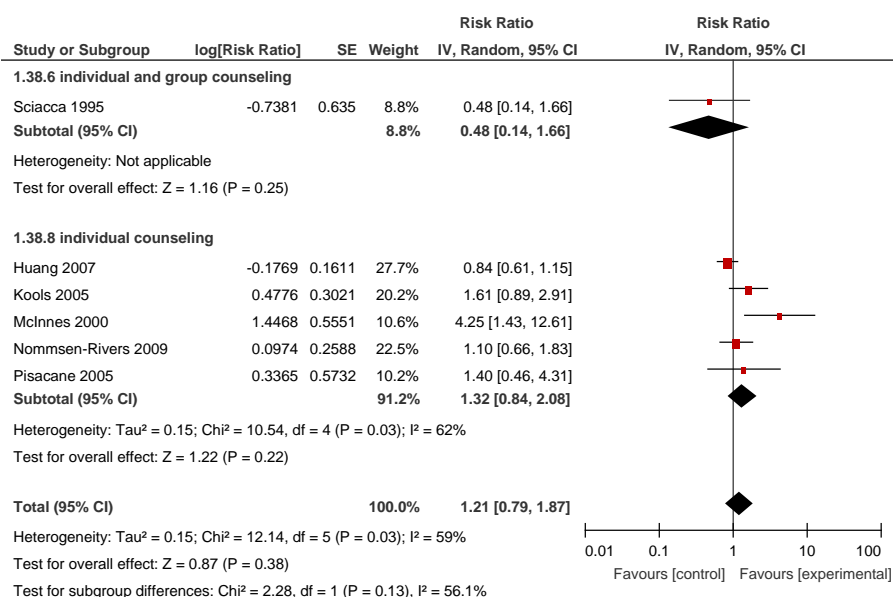

Figure 6b. Effect of breastfeeding education on the rate of partial breastfeeding at day 1: community- vs facility-based interventions.

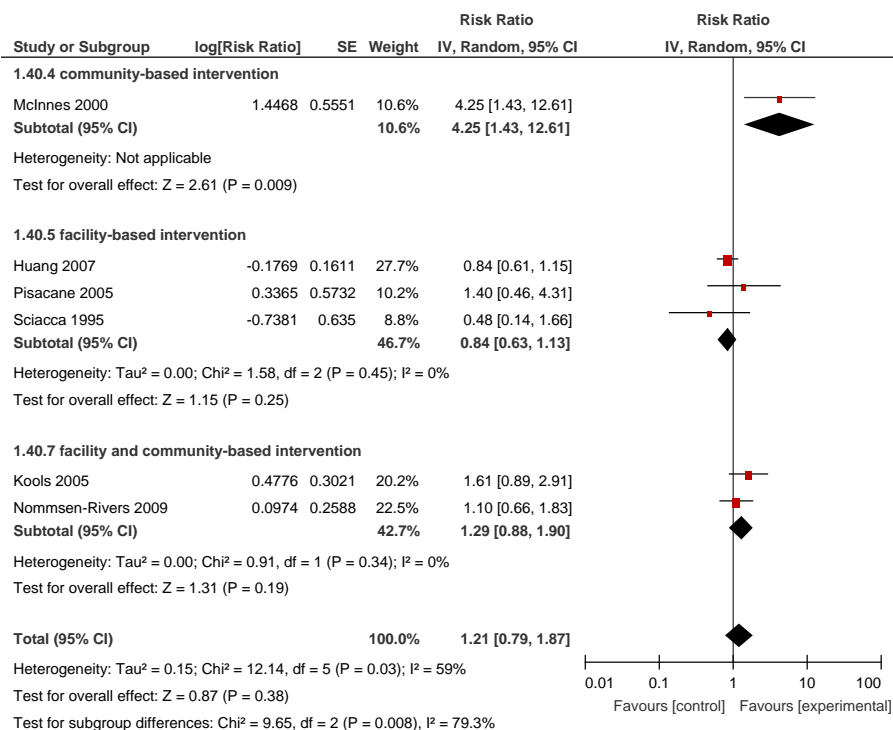

Figure 6c. Effect of breastfeeding education on the rate of partial breastfeeding at day 1: developing vs developed countries.

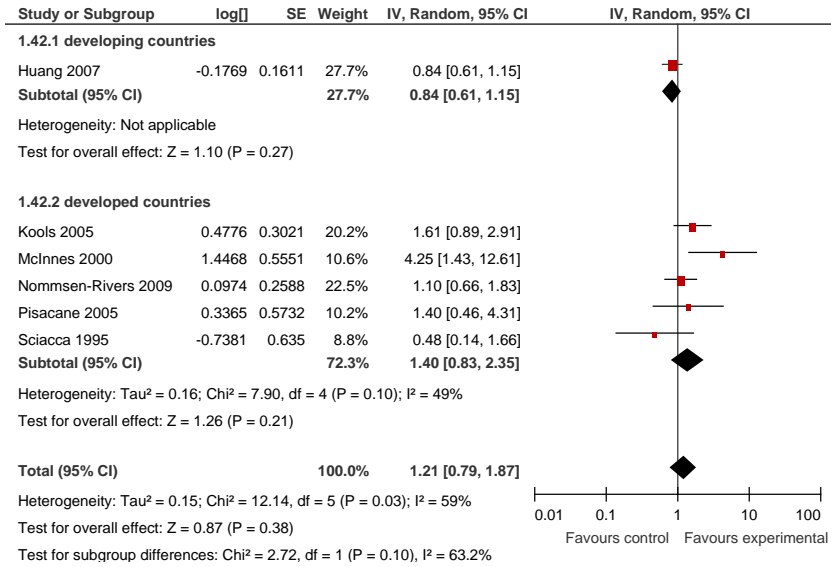

Figure 7a. Effect of breastfeeding education on the rate of partial breastfeeding at 0-1 month: individual vs group counseling.

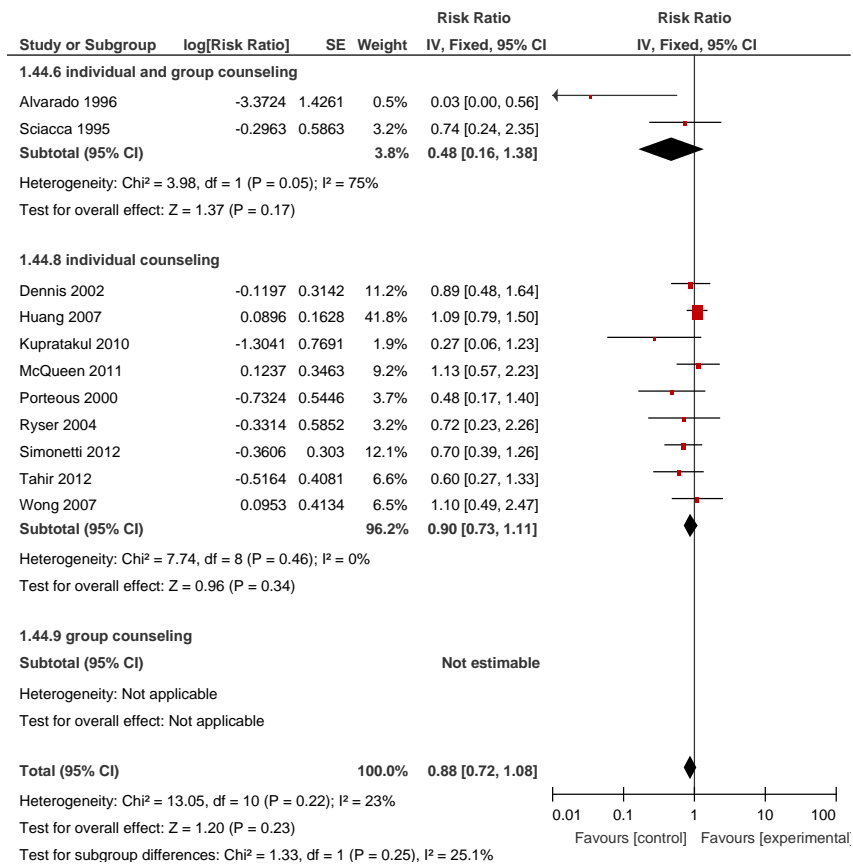

Figure 7b. Effect of breastfeeding education on the rate of partial breastfeeding at 0-1 month: community- vs facility-based interventions.

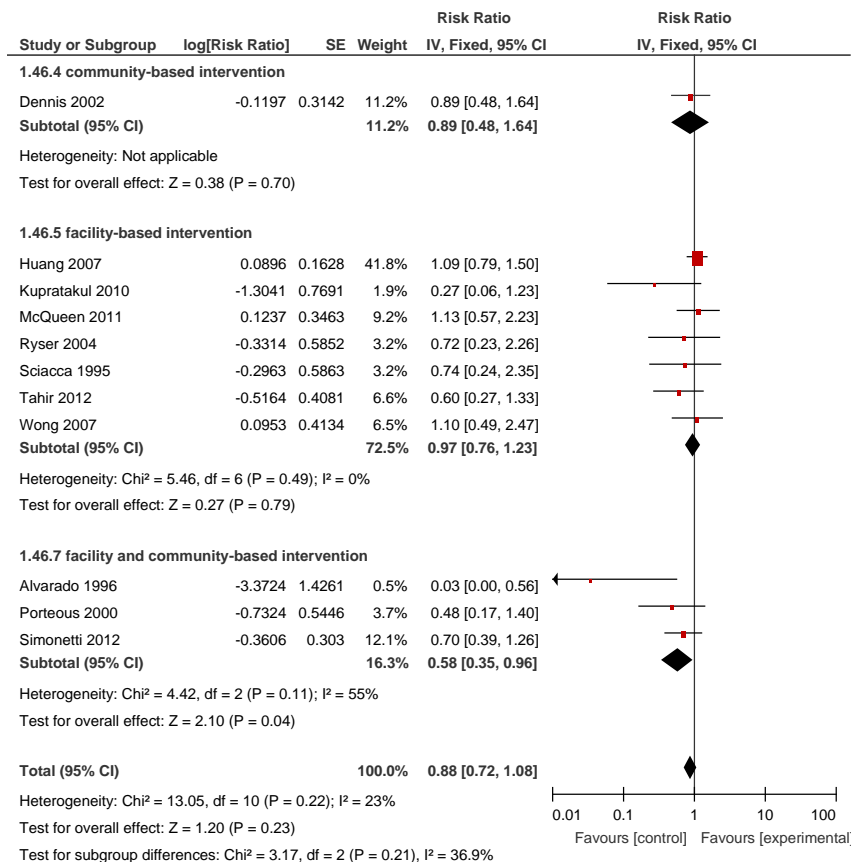

Figure 7c. Effect of breastfeeding education on the rate of partial breastfeeding at 0-1 month: developing vs developed countries.

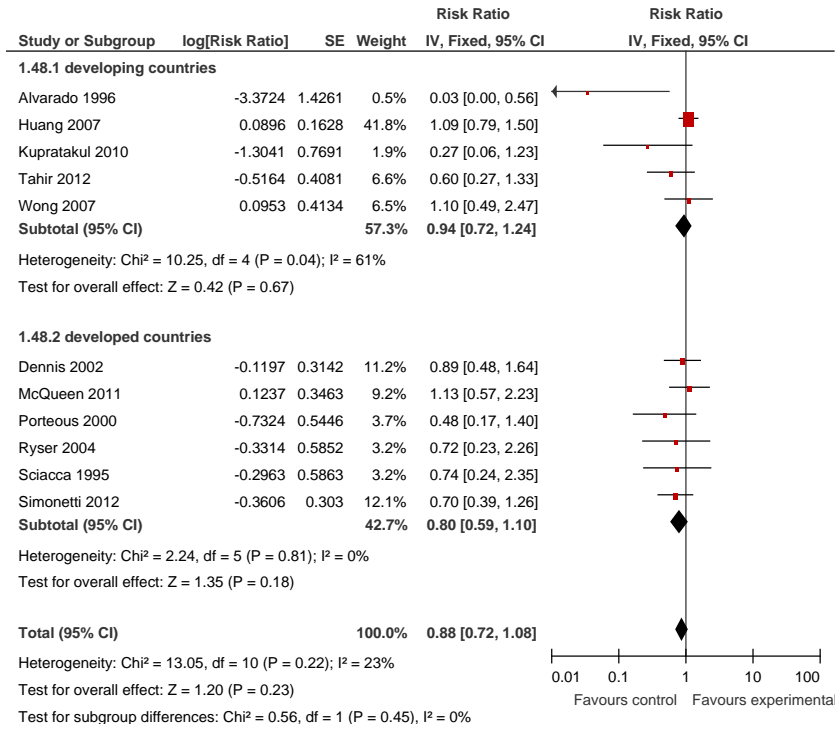

Figure 8a. Effect of breastfeeding education on the rate of partial breastfeeding at 1-6 months: individual vs group counseling.

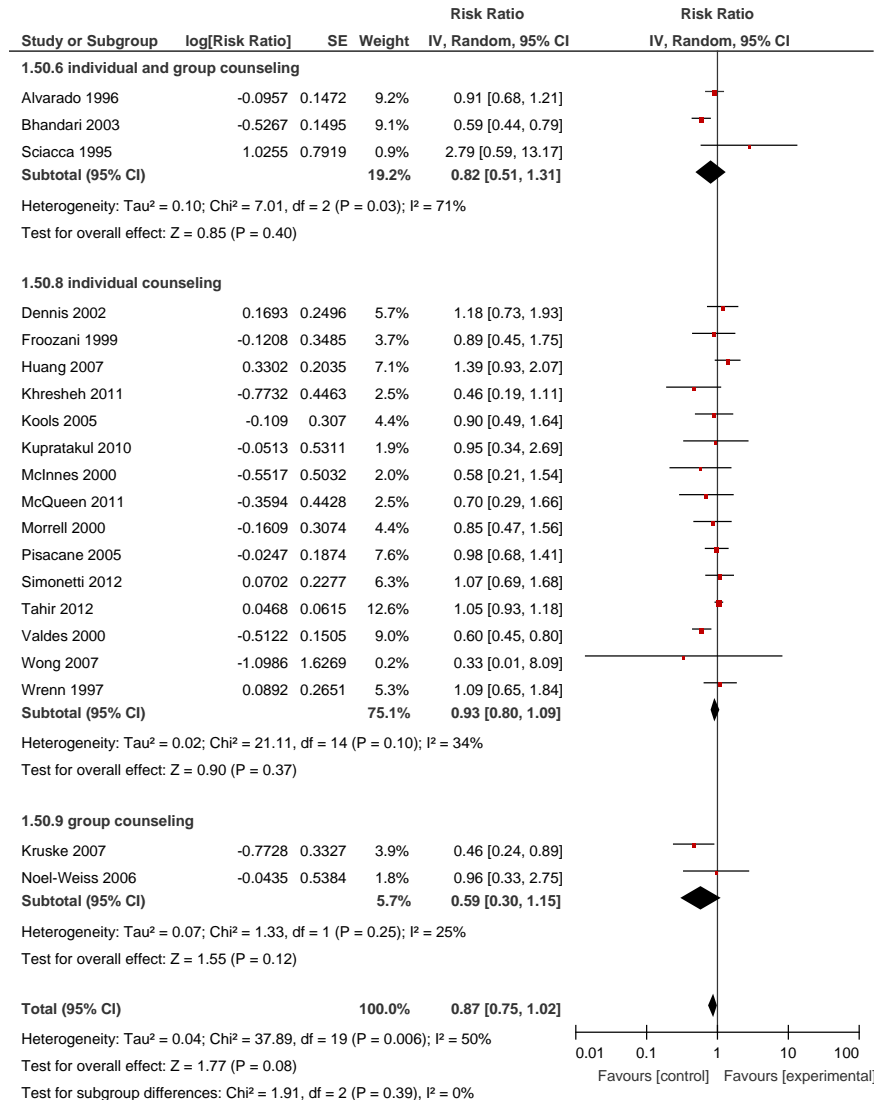

Figure 8b. Effect of breastfeeding education on the rate of partial breastfeeding at 1-6 months: community- vs facility-based interventions.

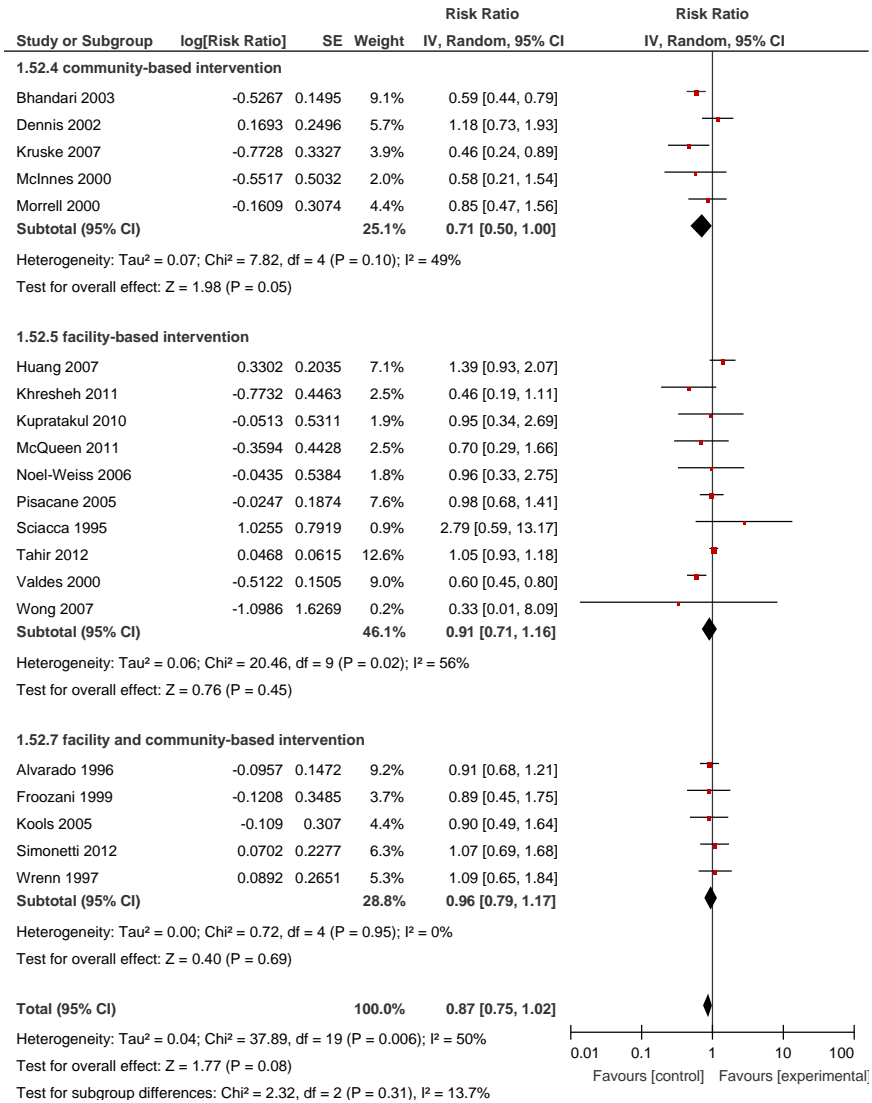

Figure 8c. Effect of breastfeeding education on the rate of partial breastfeeding at 1-6 months: developing vs developed countries.

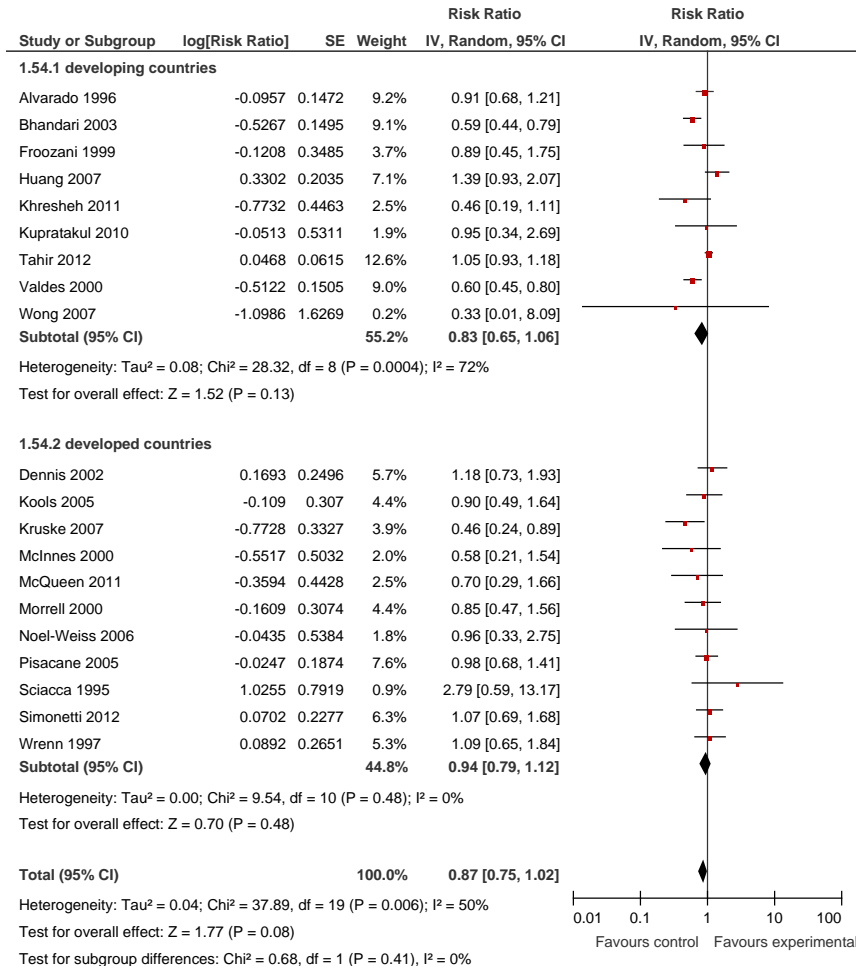

Figure 8d. Effect of breastfeeding education on the rate of partial breastfeeding at 6-12 months.

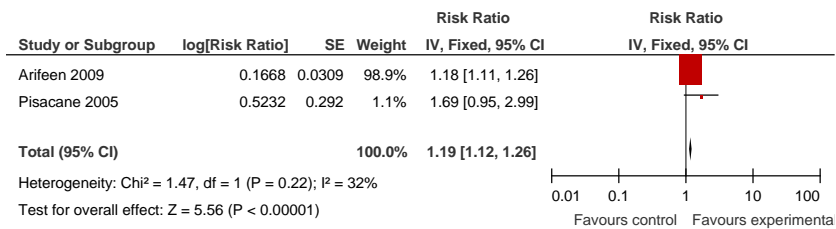



Figure 9a. Effect of breastfeeding education on the rate of no breastfeeding at day 1: individual vs group counseling.

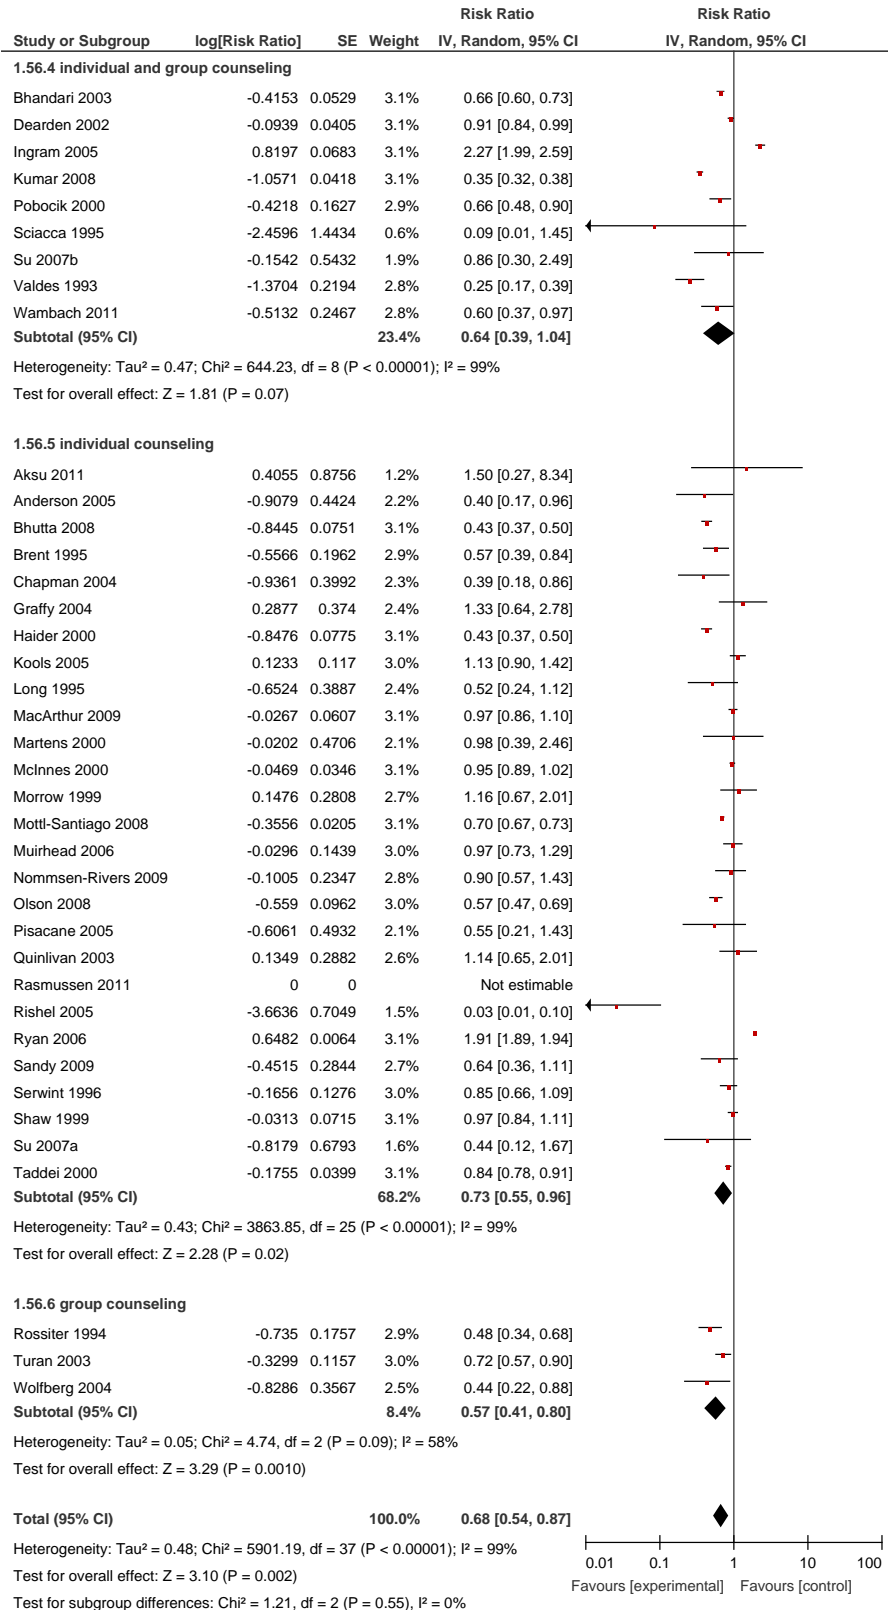

Figure 9b. Effect of breastfeeding education on the rate of no breastfeeding at day 1: community- vs facility-based interventions.

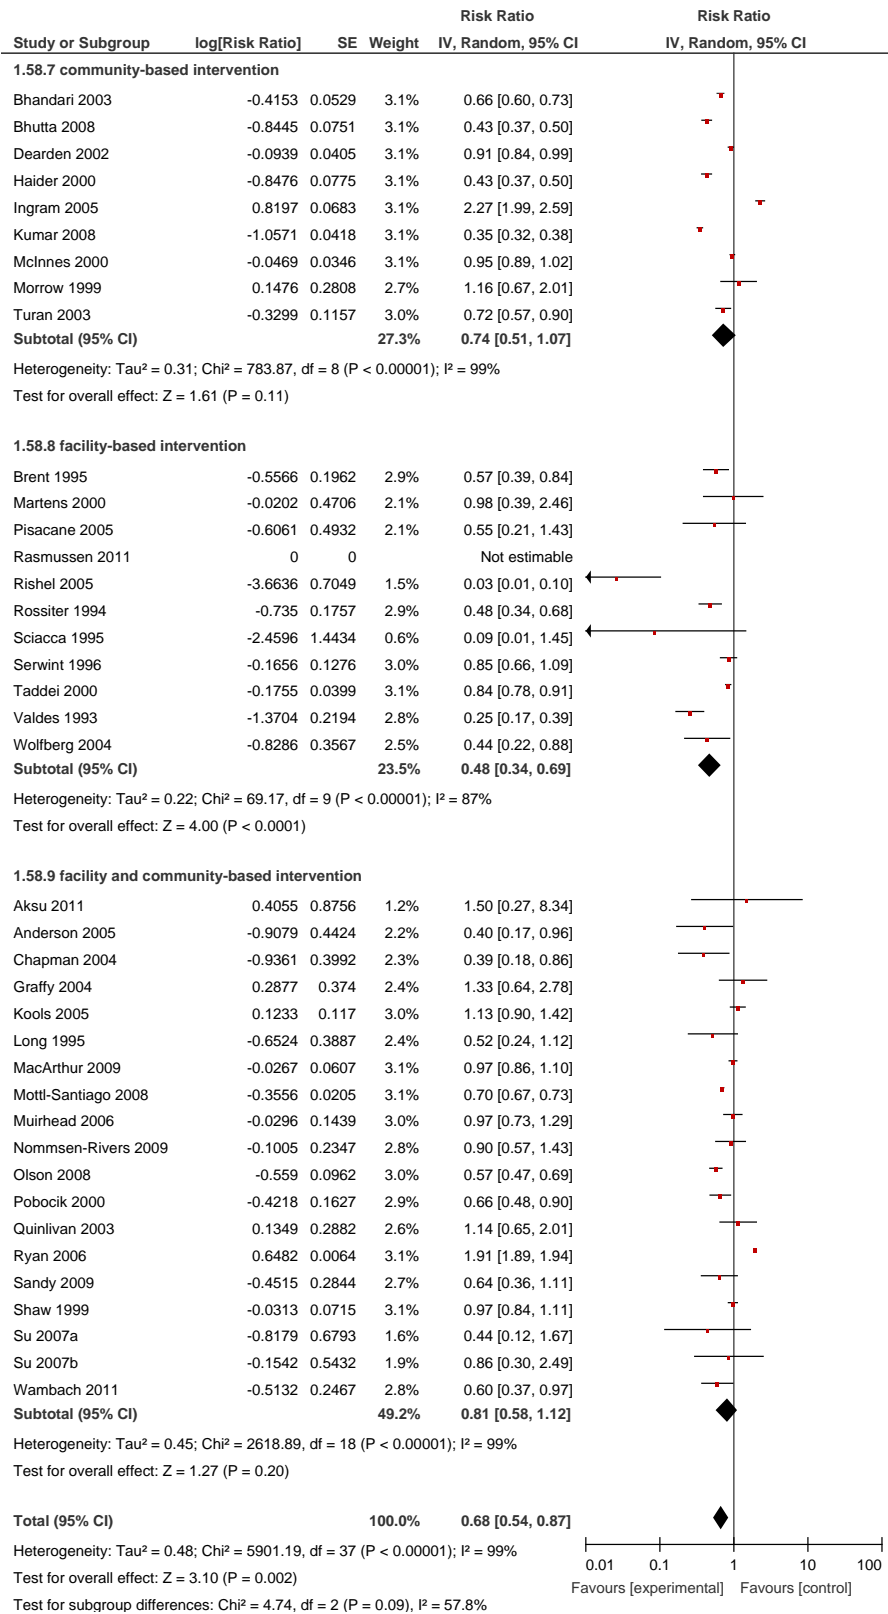

Figure 9c. Effect of breastfeeding education on the rate of no breastfeeding at day 1: developing vs developed countries.

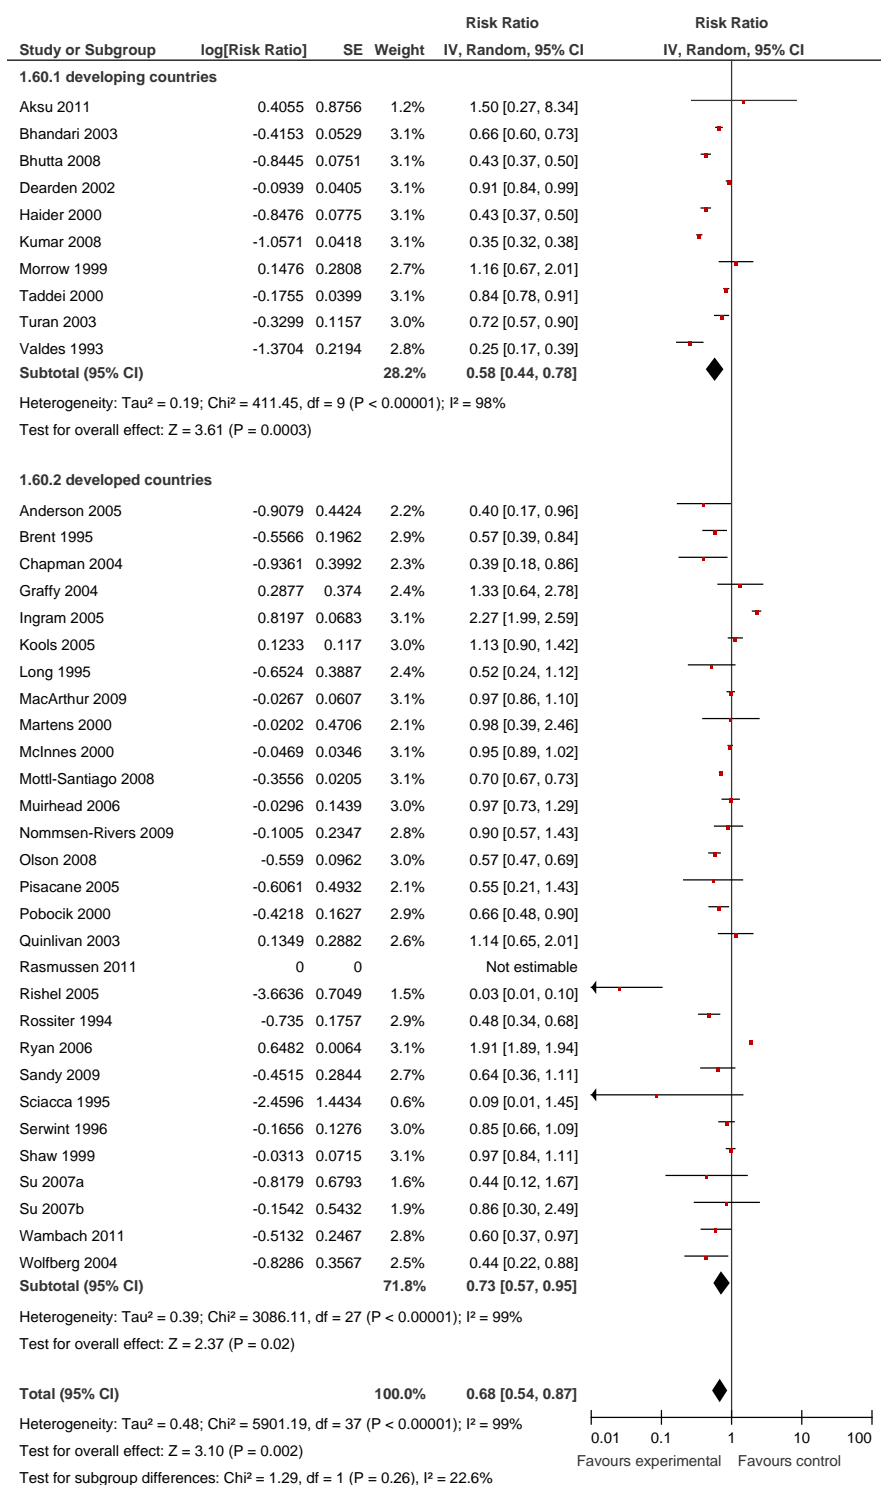

Figure 10a. Effect of breastfeeding education on the rate of no breastfeeding at 0-1 month: individual vs group counseling.

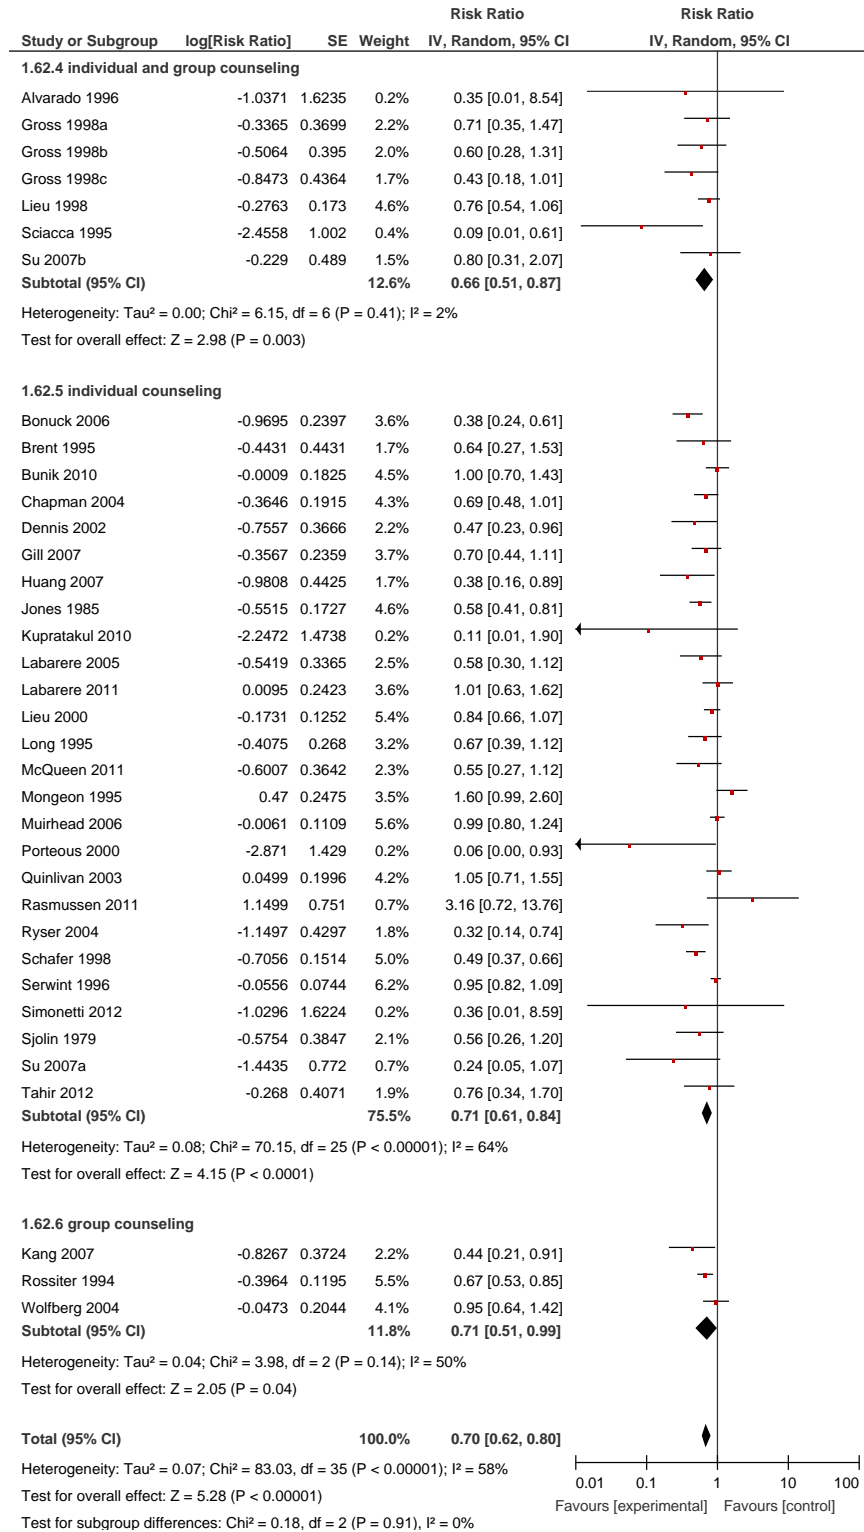

Figure 10b. Effect of breastfeeding education on the rate of no breastfeeding at 0-1 month: community- vs facility-based intervention.

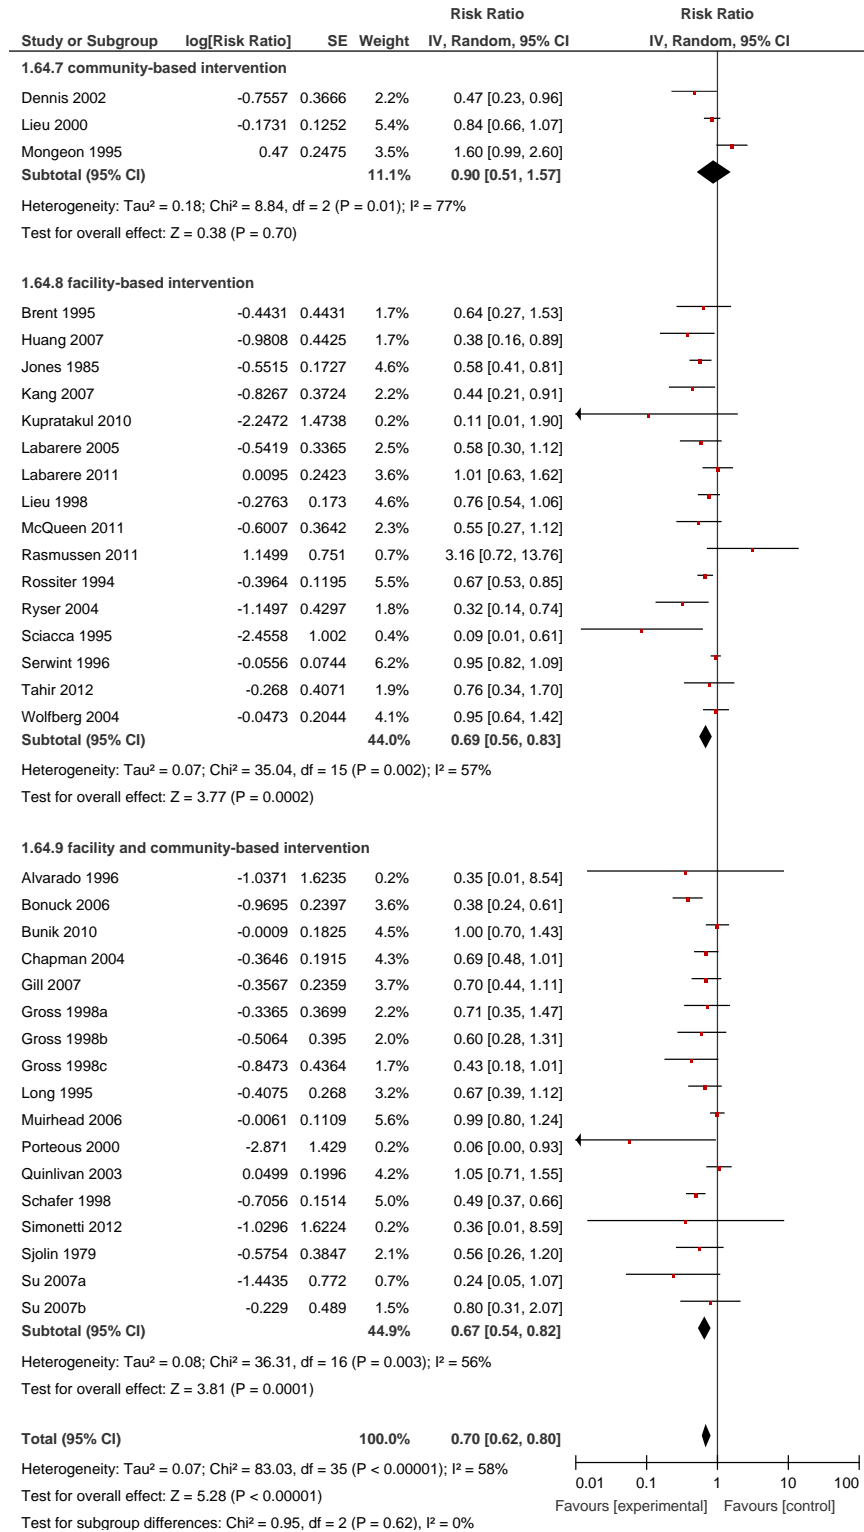

Figure 10c. Effect of breastfeeding education on the rate of no breastfeeding at 0-1 month: developing vs developed countries.

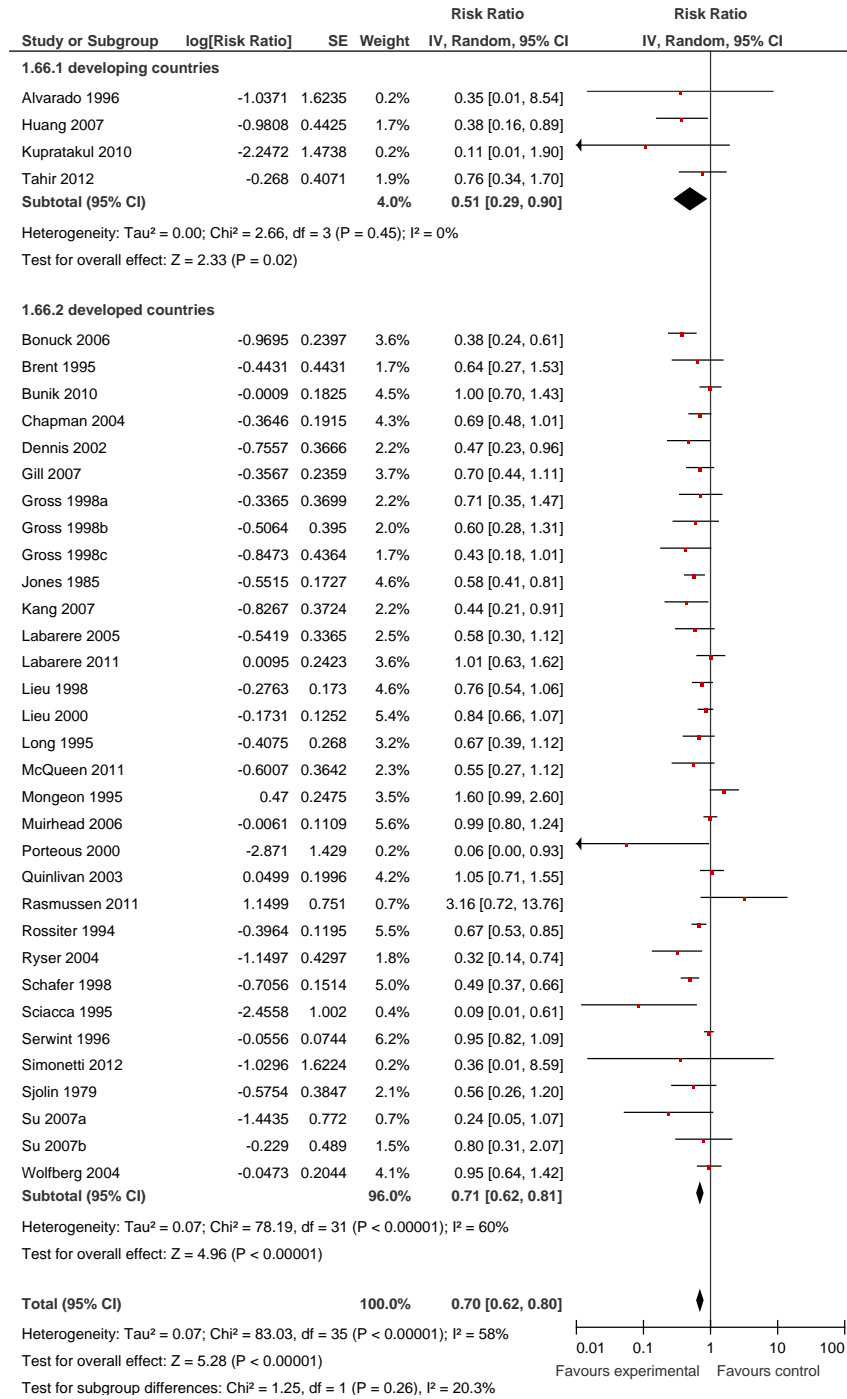

Figure 11a. Effect of breastfeeding education on the rate of no breastfeeding at 1-6 months: individual vs group counseling.

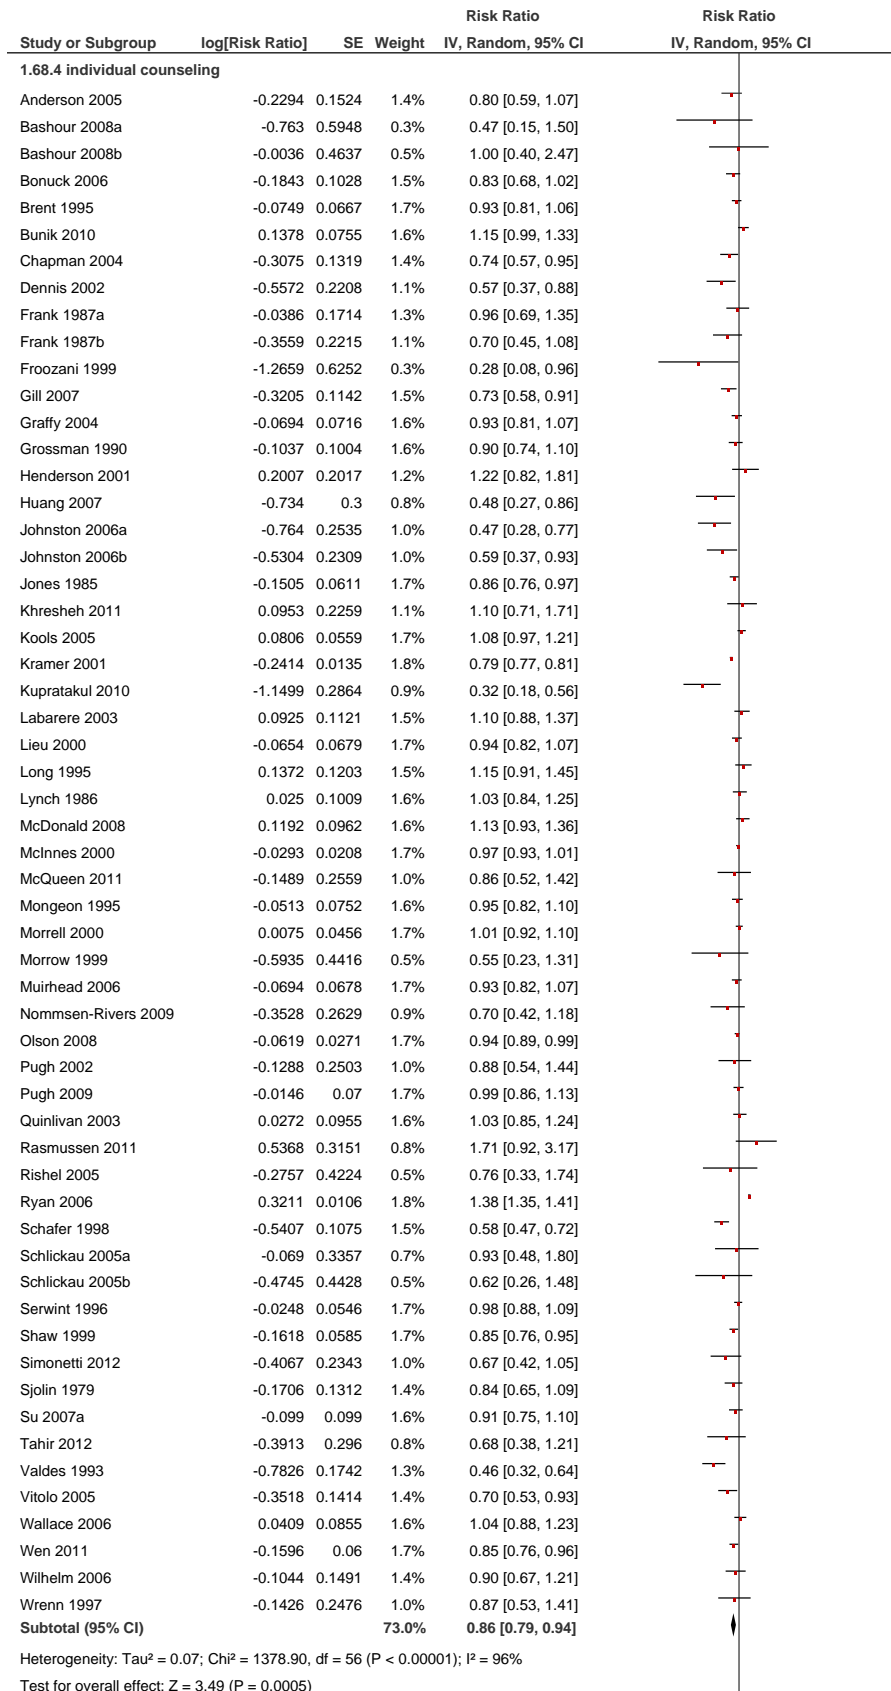

**1.68.5 group counseling**

|                          |         |        |              |                          |
|--------------------------|---------|--------|--------------|--------------------------|
| Forster 2004a            | -0.008  | 0.0894 | 1.6%         | 0.99 [0.83, 1.18]        |
| Forster 2004b            | 0.0907  | 0.0857 | 1.6%         | 1.09 [0.93, 1.30]        |
| Garcia-Montrone 1996     | -0.47   | 0.3536 | 0.7%         | 0.63 [0.31, 1.25]        |
| Hill 1987                | -0.1285 | 0.1832 | 1.2%         | 0.88 [0.61, 1.26]        |
| Kang 2007                | -0.6931 | 0.2415 | 1.0%         | 0.50 [0.31, 0.80]        |
| Kruske 2007              | -1.3519 | 0.3066 | 0.8%         | 0.26 [0.14, 0.47]        |
| Noel-Weiss 2006          | -0.4002 | 0.4465 | 0.5%         | 0.67 [0.28, 1.61]        |
| Reifsnider 1997          | -0.2758 | 0.1796 | 1.2%         | 0.76 [0.53, 1.08]        |
| Rossiter 1994            | -0.1207 | 0.0778 | 1.6%         | 0.89 [0.76, 1.03]        |
| Turan 2003               | -0.7428 | 0.3375 | 0.7%         | 0.48 [0.25, 0.92]        |
| Wolfberg 2004            | -0.2098 | 0.1676 | 1.3%         | 0.81 [0.58, 1.13]        |
| <b>Subtotal (95% CI)</b> |         |        | <b>12.2%</b> | <b>0.76 [0.63, 0.91]</b> |

Heterogeneity:  $\tau^2 = 0.05$ ;  $\chi^2 = 35.21$ ,  $df = 10$  ( $P = 0.0001$ );  $I^2 = 72\%$   
 Test for overall effect:  $Z = 2.96$  ( $P = 0.003$ )

**1.68.6 individual and group counseling**

|                          |         |        |              |                          |
|--------------------------|---------|--------|--------------|--------------------------|
| Alvarado 1996            | -3.1564 | 1.0044 | 0.1%         | 0.04 [0.01, 0.30]        |
| Bhandari 2003            | 1.2273  | 0.7877 | 0.2%         | 3.41 [0.73, 15.98]       |
| Gross 1998a              | -0.6217 | 0.1895 | 1.2%         | 0.54 [0.37, 0.78]        |
| Gross 1998b              | -0.6993 | 0.2189 | 1.1%         | 0.50 [0.32, 0.76]        |
| Gross 1998c              | -0.4798 | 0.1563 | 1.3%         | 0.62 [0.46, 0.84]        |
| Ingram 2005              | 0.4406  | 0.0404 | 1.7%         | 1.55 [1.44, 1.68]        |
| Lovera 2010              | -0.3201 | 0.1534 | 1.3%         | 0.73 [0.54, 0.98]        |
| Pobocik 2000             | -0.2013 | 0.0656 | 1.7%         | 0.82 [0.72, 0.93]        |
| Redman 1995              | 0.0155  | 0.1    | 1.6%         | 1.02 [0.83, 1.24]        |
| Rosen 2008               | -0.4797 | 0.163  | 1.3%         | 0.62 [0.45, 0.85]        |
| Sciacca 1995             | -0.6793 | 0.2693 | 0.9%         | 0.51 [0.30, 0.86]        |
| Su 2007b                 | -0.1381 | 0.101  | 1.6%         | 0.87 [0.71, 1.06]        |
| Valdes 2000              | -1.4087 | 0.3058 | 0.8%         | 0.24 [0.13, 0.45]        |
| <b>Subtotal (95% CI)</b> |         |        | <b>14.8%</b> | <b>0.68 [0.51, 0.91]</b> |

Heterogeneity:  $\tau^2 = 0.22$ ;  $\chi^2 = 205.09$ ,  $df = 12$  ( $P < 0.00001$ );  $I^2 = 94\%$   
 Test for overall effect:  $Z = 2.59$  ( $P = 0.010$ )

**Total (95% CI)** 100.0% 0.82 [0.77, 0.89]

Heterogeneity:  $\tau^2 = 0.08$ ;  $\chi^2 = 1635.68$ ,  $df = 80$  ( $P < 0.00001$ );  $I^2 = 95\%$   
 Test for overall effect:  $Z = 5.26$  ( $P < 0.00001$ )

Test for subgroup differences:  $\chi^2 = 3.53$ ,  $df = 2$  ( $P = 0.17$ ),  $I^2 = 43.3\%$

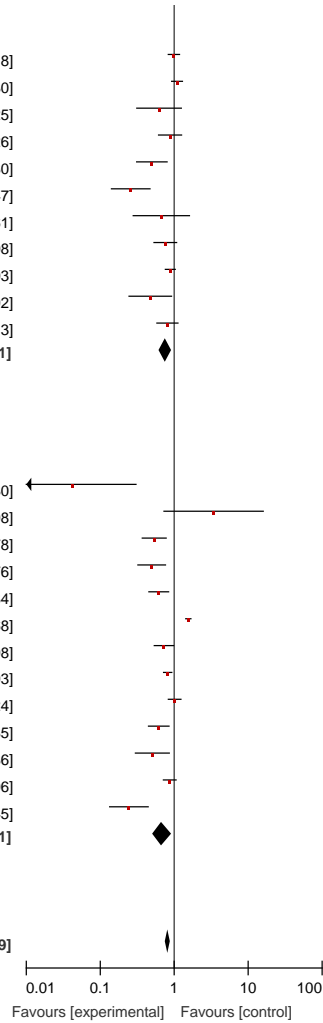



Figure 11b. Effect of breastfeeding education on the rate of no breastfeeding at 1-6 months: community- vs facility-based intervention.

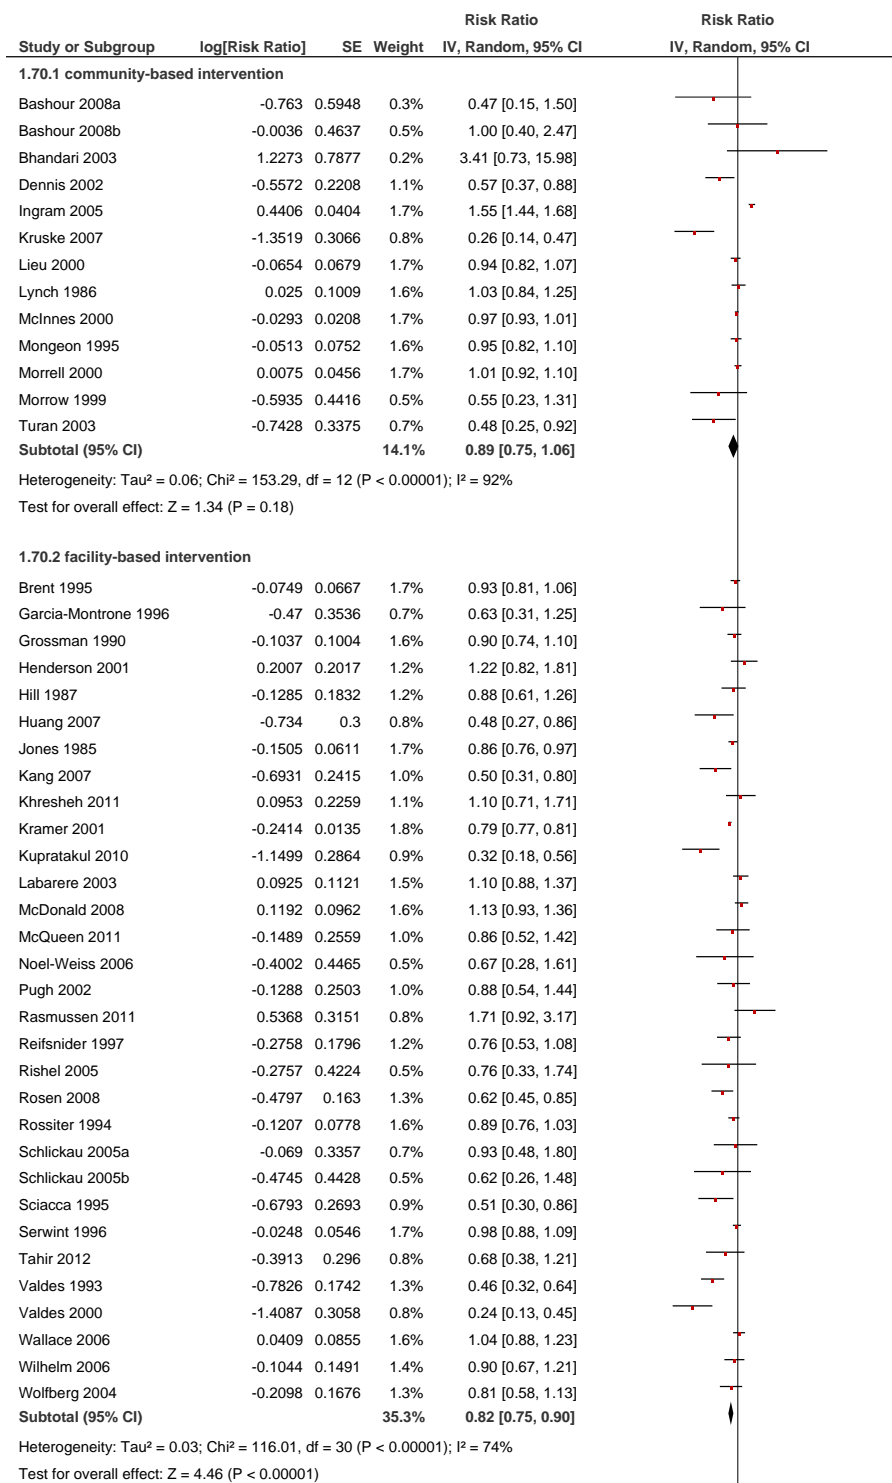

**1.70.3 facility and community-based intervention**

|                          |         |        |              |                          |
|--------------------------|---------|--------|--------------|--------------------------|
| Alvarado 1996            | -3.1564 | 1.0044 | 0.1%         | 0.04 [0.01, 0.30]        |
| Anderson 2005            | -0.2294 | 0.1524 | 1.4%         | 0.80 [0.59, 1.07]        |
| Bonuck 2006              | -0.1843 | 0.1028 | 1.5%         | 0.83 [0.68, 1.02]        |
| Bunik 2010               | 0.1378  | 0.0755 | 1.6%         | 1.15 [0.99, 1.33]        |
| Chapman 2004             | -0.3075 | 0.1319 | 1.4%         | 0.74 [0.57, 0.95]        |
| Forster 2004a            | -0.008  | 0.0894 | 1.6%         | 0.99 [0.83, 1.18]        |
| Forster 2004b            | 0.0907  | 0.0857 | 1.6%         | 1.09 [0.93, 1.30]        |
| Frank 1987a              | -0.0386 | 0.1714 | 1.3%         | 0.96 [0.69, 1.35]        |
| Frank 1987b              | -0.3559 | 0.2215 | 1.1%         | 0.70 [0.45, 1.08]        |
| Froozani 1999            | -1.2659 | 0.6252 | 0.3%         | 0.28 [0.08, 0.96]        |
| Gill 2007                | -0.3205 | 0.1142 | 1.5%         | 0.73 [0.58, 0.91]        |
| Graffy 2004              | -0.0694 | 0.0716 | 1.6%         | 0.93 [0.81, 1.07]        |
| Gross 1998a              | -0.6217 | 0.1895 | 1.2%         | 0.54 [0.37, 0.78]        |
| Gross 1998b              | -0.6993 | 0.2189 | 1.1%         | 0.50 [0.32, 0.76]        |
| Gross 1998c              | -0.4798 | 0.1563 | 1.3%         | 0.62 [0.46, 0.84]        |
| Johnston 2006a           | -0.764  | 0.2535 | 1.0%         | 0.47 [0.28, 0.77]        |
| Johnston 2006b           | -0.5304 | 0.2309 | 1.0%         | 0.59 [0.37, 0.93]        |
| Kools 2005               | 0.0806  | 0.0559 | 1.7%         | 1.08 [0.97, 1.21]        |
| Long 1995                | 0.1372  | 0.1203 | 1.5%         | 1.15 [0.91, 1.45]        |
| Lovera 2010              | -0.3201 | 0.1534 | 1.3%         | 0.73 [0.54, 0.98]        |
| Muirhead 2006            | -0.0694 | 0.0678 | 1.7%         | 0.93 [0.82, 1.07]        |
| Nommsen-Rivers 2009      | -0.3528 | 0.2629 | 0.9%         | 0.70 [0.42, 1.18]        |
| Olson 2008               | -0.0619 | 0.0271 | 1.7%         | 0.94 [0.89, 0.99]        |
| Pobocik 2000             | -0.2013 | 0.0656 | 1.7%         | 0.82 [0.72, 0.93]        |
| Pugh 2009                | -0.0146 | 0.07   | 1.7%         | 0.99 [0.86, 1.13]        |
| Quinlivan 2003           | 0.0272  | 0.0955 | 1.6%         | 1.03 [0.85, 1.24]        |
| Redman 1995              | 0.0155  | 0.1    | 1.6%         | 1.02 [0.83, 1.24]        |
| Ryan 2006                | 0.3211  | 0.0106 | 1.8%         | 1.38 [1.35, 1.41]        |
| Schafer 1998             | -0.5407 | 0.1075 | 1.5%         | 0.58 [0.47, 0.72]        |
| Shaw 1999                | -0.1618 | 0.0585 | 1.7%         | 0.85 [0.76, 0.95]        |
| Simonetti 2012           | -0.4067 | 0.2343 | 1.0%         | 0.67 [0.42, 1.05]        |
| Sjolin 1979              | -0.1706 | 0.1312 | 1.4%         | 0.84 [0.65, 1.09]        |
| Su 2007a                 | -0.099  | 0.099  | 1.6%         | 0.91 [0.75, 1.10]        |
| Su 2007b                 | -0.1381 | 0.101  | 1.6%         | 0.87 [0.71, 1.06]        |
| Vitolo 2005              | -0.3518 | 0.1414 | 1.4%         | 0.70 [0.53, 0.93]        |
| Wen 2011                 | -0.1596 | 0.06   | 1.7%         | 0.85 [0.76, 0.96]        |
| Wrenn 1997               | -0.1426 | 0.2476 | 1.0%         | 0.87 [0.53, 1.41]        |
| <b>Subtotal (95% CI)</b> |         |        | <b>50.6%</b> | <b>0.83 [0.75, 0.92]</b> |

Heterogeneity:  $\tau^2 = 0.08$ ;  $\chi^2 = 662.79$ ,  $df = 36$  ( $P < 0.00001$ );  $I^2 = 95\%$

Test for overall effect:  $Z = 3.50$  ( $P = 0.0005$ )

**Total (95% CI)** **100.0%** **0.82 [0.77, 0.89]**

Heterogeneity:  $\tau^2 = 0.08$ ;  $\chi^2 = 1635.68$ ,  $df = 80$  ( $P < 0.00001$ );  $I^2 = 95\%$

Test for overall effect:  $Z = 5.26$  ( $P < 0.00001$ )

Test for subgroup differences:  $\chi^2 = 0.63$ ,  $df = 2$  ( $P = 0.73$ ),  $I^2 = 0\%$

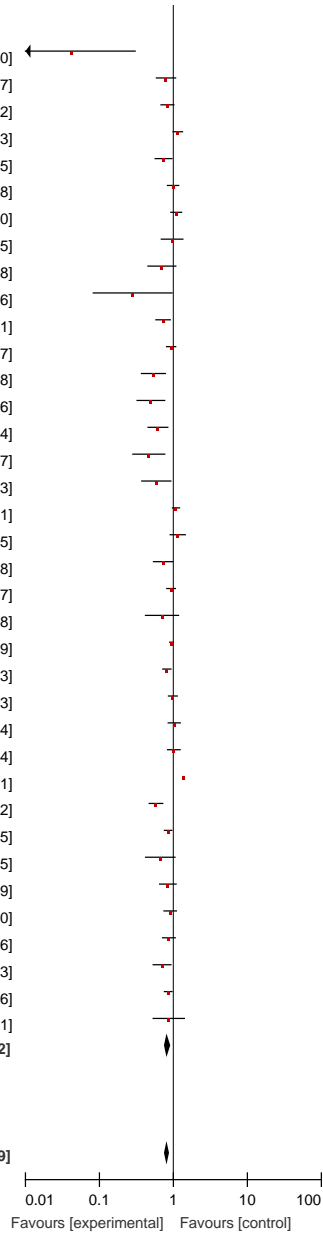

Figure 11c. Effect of breastfeeding education on the rate of no breastfeeding at 1-6 months: developing vs developed countries.

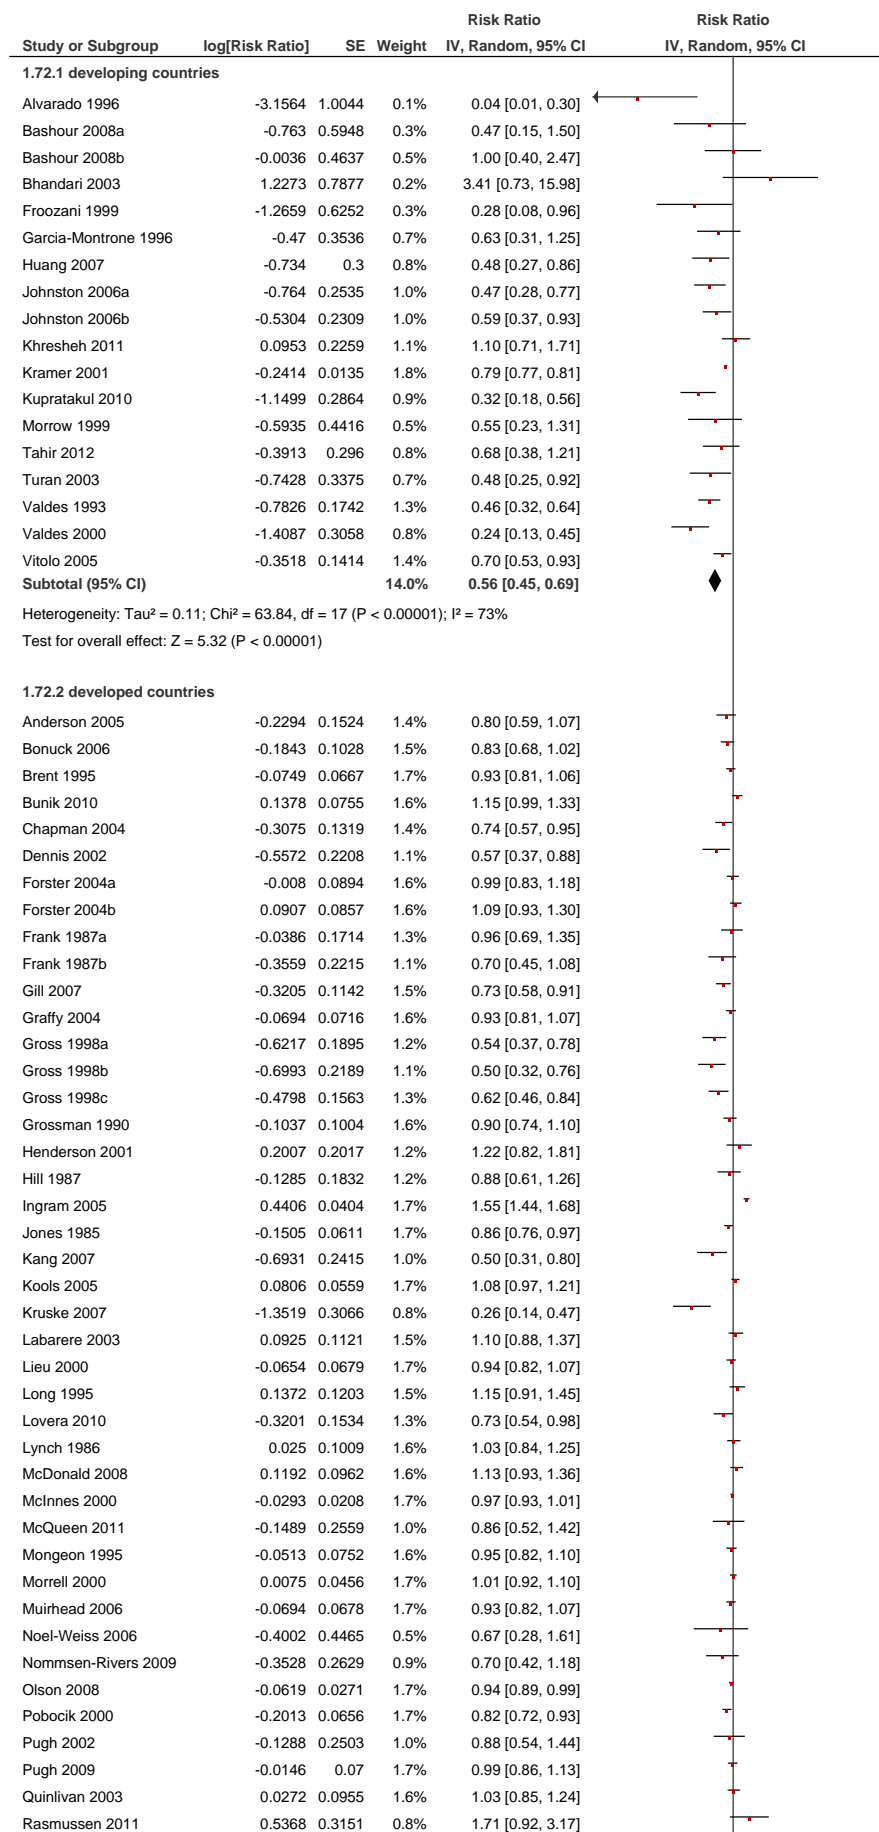

|                          |         |        |              |                          |
|--------------------------|---------|--------|--------------|--------------------------|
| Redman 1995              | 0.0155  | 0.1    | 1.6%         | 1.02 [0.83, 1.24]        |
| Reifsnider 1997          | -0.2758 | 0.1796 | 1.2%         | 0.76 [0.53, 1.08]        |
| Rishel 2005              | -0.2757 | 0.4224 | 0.5%         | 0.76 [0.33, 1.74]        |
| Rosen 2008               | -0.4797 | 0.163  | 1.3%         | 0.62 [0.45, 0.85]        |
| Rossiter 1994            | -0.1207 | 0.0778 | 1.6%         | 0.89 [0.76, 1.03]        |
| Ryan 2006                | 0.3211  | 0.0106 | 1.8%         | 1.38 [1.35, 1.41]        |
| Schafer 1998             | -0.5407 | 0.1075 | 1.5%         | 0.58 [0.47, 0.72]        |
| Schlickau 2005a          | -0.069  | 0.3357 | 0.7%         | 0.93 [0.48, 1.80]        |
| Schlickau 2005b          | -0.4745 | 0.4428 | 0.5%         | 0.62 [0.26, 1.48]        |
| Sciaccia 1995            | -0.6793 | 0.2693 | 0.9%         | 0.51 [0.30, 0.86]        |
| Serwint 1996             | -0.0248 | 0.0546 | 1.7%         | 0.98 [0.88, 1.09]        |
| Shaw 1999                | -0.1618 | 0.0585 | 1.7%         | 0.85 [0.76, 0.95]        |
| Simonetti 2012           | -0.4067 | 0.2343 | 1.0%         | 0.67 [0.42, 1.05]        |
| Sjolin 1979              | -0.1706 | 0.1312 | 1.4%         | 0.84 [0.65, 1.09]        |
| Su 2007a                 | -0.099  | 0.099  | 1.6%         | 0.91 [0.75, 1.10]        |
| Su 2007b                 | -0.1381 | 0.101  | 1.6%         | 0.87 [0.71, 1.06]        |
| Wallace 2006             | 0.0409  | 0.0855 | 1.6%         | 1.04 [0.88, 1.23]        |
| Wen 2011                 | -0.1596 | 0.06   | 1.7%         | 0.85 [0.76, 0.96]        |
| Wilhelm 2006             | -0.1044 | 0.1491 | 1.4%         | 0.90 [0.67, 1.21]        |
| Wolffberg 2004           | -0.2098 | 0.1676 | 1.3%         | 0.81 [0.58, 1.13]        |
| Wrenn 1997               | -0.1426 | 0.2476 | 1.0%         | 0.87 [0.53, 1.41]        |
| <b>Subtotal (95% CI)</b> |         |        | <b>86.0%</b> | <b>0.88 [0.82, 0.95]</b> |

Heterogeneity: Tau<sup>2</sup> = 0.06; Chi<sup>2</sup> = 928.57, df = 62 (P < 0.00001); I<sup>2</sup> = 93%

Test for overall effect: Z = 3.53 (P = 0.0004)

|                       |  |  |               |                          |
|-----------------------|--|--|---------------|--------------------------|
| <b>Total (95% CI)</b> |  |  | <b>100.0%</b> | <b>0.82 [0.77, 0.89]</b> |
|-----------------------|--|--|---------------|--------------------------|

Heterogeneity: Tau<sup>2</sup> = 0.08; Chi<sup>2</sup> = 1635.68, df = 80 (P < 0.00001); I<sup>2</sup> = 95%

Test for overall effect: Z = 5.26 (P < 0.00001)

Test for subgroup differences: Chi<sup>2</sup> = 15.69, df = 1 (P < 0.0001), I<sup>2</sup> = 93.6%

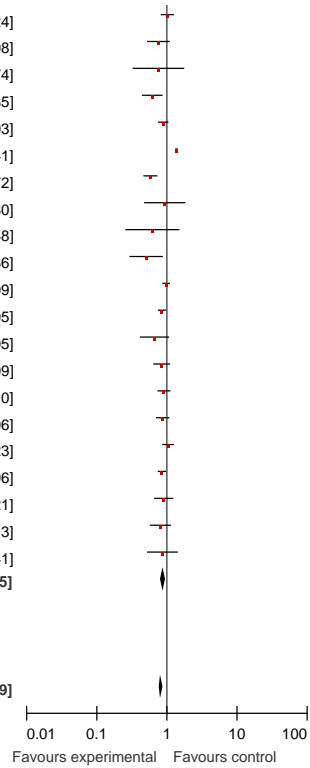

Figure 11d. Effect of breastfeeding education on the rate of no breastfeeding at 6-12 months.

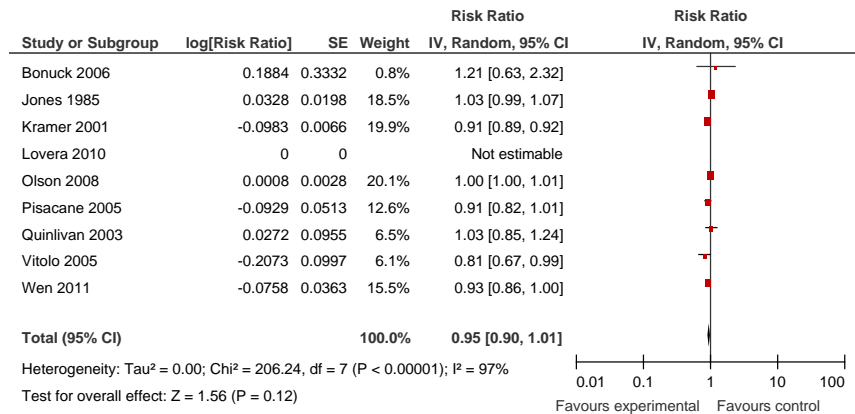

Figure 11e. Effect of breastfeeding education on the rate of no breastfeeding from 12 to 23 months.

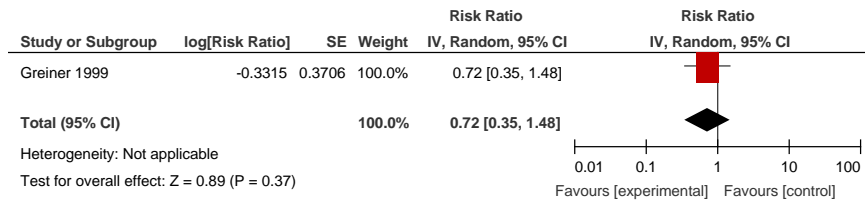

Supplement: MOESM2 [file 9496754]
